# Supplementary material for: Medication safety risks to be managed in national implementation of automatic substitution of biological medicines: a qualitative study
Source: PubMed Central journal article supplement — BMJ Open. 2019 Oct 28;9(10):e032892. doi: 10.1136/bmjopen-2019-032892 (PMC6830661; doi:10.1136/bmjopen-2019-032892), 2019-10-28
Supplement: bmjopen-2019-032892.draft_revisions.pdf [file bmjopen-2019-032892.draft_revisions.pdf]

# BMJ Open

BMJ Open is committed to open peer review. As part of this commitment we make the peer review history of every article we publish publicly available.

When an article is published we post the peer reviewers' comments and the authors' responses online. We also post the versions of the paper that were used during peer review. These are the versions that the peer review comments apply to.

The versions of the paper that follow are the versions that were submitted during the peer review process. They are not the versions of record or the final published versions. They should not be cited or distributed as the published version of this manuscript.

BMJ Open is an open access journal and the full, final, typeset and author-corrected version of record of the manuscript is available on our site with no access controls, subscription charges or pay-per-view fees (<http://bmjopen.bmj.com>).

If you have any questions on BMJ Open's open peer review process please email [info.bmjopen@bmj.com](mailto:info.bmjopen@bmj.com)

# BMJ Open

## MEDICATION SAFETY RISKS TO BE MANAGED IN NATIONAL IMPLEMENTATION OF AUTOMATIC SUBSTITUTION OF BIOLOGICAL MEDICINES – A QUALITATIVE STUDY

|                               |                                                                                                                                                                                                                                                                                                                                                                                                                                                                                                                                                                                                                                                                                 |
|-------------------------------|---------------------------------------------------------------------------------------------------------------------------------------------------------------------------------------------------------------------------------------------------------------------------------------------------------------------------------------------------------------------------------------------------------------------------------------------------------------------------------------------------------------------------------------------------------------------------------------------------------------------------------------------------------------------------------|
| Journal:                      | <i>BMJ Open</i>                                                                                                                                                                                                                                                                                                                                                                                                                                                                                                                                                                                                                                                                 |
| Manuscript ID                 | bmjopen-2019-032892                                                                                                                                                                                                                                                                                                                                                                                                                                                                                                                                                                                                                                                             |
| Article Type:                 | Research                                                                                                                                                                                                                                                                                                                                                                                                                                                                                                                                                                                                                                                                        |
| Date Submitted by the Author: | 11-Jul-2019                                                                                                                                                                                                                                                                                                                                                                                                                                                                                                                                                                                                                                                                     |
| Complete List of Authors:     | Tolonen, Hanna; Helsingin Yliopisto, Clinical Pharmacy Group, Division of Pharmacology and Pharmacotherapy, Faculty of Pharmacy; Helsingin yliopistollinen Keskussairaala, HUS Pharmacy<br>Airaksinen, Marja; Helsingin Yliopisto, Clinical Pharmacy Group, Division of Pharmacology and Pharmacotherapy, Faculty of Pharmacy<br>Ruokoniemi, Päivi; Finnish Medicines Agency Fimea<br>Hämeen-Anttila, Katri; Finnish Medicines Agency Fimea<br>Shermock, Kenneth; Johns Hopkins Hospital, Center for Medication Quality and Outcomes; Johns Hopkins University Bloomberg School of Public Health, Center for Drug Safety and Effectiveness<br>Kurki, Pekka; Helsingin Yliopisto |
| Keywords:                     | Biosimilars, biological medicines, medication safety, automatic substitution, interchangeability                                                                                                                                                                                                                                                                                                                                                                                                                                                                                                                                                                                |
|                               |                                                                                                                                                                                                                                                                                                                                                                                                                                                                                                                                                                                                                                                                                 |

SCHOLARONE™  
Manuscripts

1  
2  
3  
4  
5  
6  
7  
8  
9  
10  
11  
12  
13  
14  
15  
16  
17  
18  
19  
20  
21  
22  
23  
24  
25  
26  
27  
28  
29  
30  
31  
32  
33  
34  
35  
36  
37  
38  
39  
40  
41  
42  
43  
44  
45  
46  
47  
48  
49  
50  
51  
52  
53  
54  
55  
56  
57  
58  
59  
60

**MEDICATION SAFETY RISKS TO BE MANAGED IN NATIONAL IMPLEMENTATION OF AUTOMATIC  
SUBSTITUTION OF BIOLOGICAL MEDICINES – A QUALITATIVE STUDY**

|                                                 |                                                                                                                                                                                                                                                                                                                                            |
|-------------------------------------------------|--------------------------------------------------------------------------------------------------------------------------------------------------------------------------------------------------------------------------------------------------------------------------------------------------------------------------------------------|
| <i>Authors</i>                                  | Hanna M. Tolonen, Marja Airaksinen, Päivi Ruokoniemi, Katri Hämeen-Anttila, Kenneth M. Shermock, Pekka Kurki                                                                                                                                                                                                                               |
| <i>Position and affiliation for each author</i> | Hanna M. Tolonen, M.Sc. (Pharm), PhD student <ul style="list-style-type: none"> <li>- HUS Pharmacy, Hospital Pharmacy of Helsinki University Hospital (HUS), Helsinki, Finland</li> <li>- Clinical Pharmacy Group, Division of Pharmacology and Pharmacotherapy, Faculty of Pharmacy, University of Helsinki, Helsinki, Finland</li> </ul> |
|                                                 | Marja Airaksinen, PhD, Professor <ul style="list-style-type: none"> <li>- Clinical Pharmacy Group, Division of Pharmacology and Pharmacotherapy, Faculty of Pharmacy, University of Helsinki, Helsinki, Finland</li> </ul>                                                                                                                 |
|                                                 | Päivi Ruokoniemi, MD, PhD, Senior Medical Officer <ul style="list-style-type: none"> <li>- Finnish Medicines Agency Fimea, Helsinki, Finland</li> </ul>                                                                                                                                                                                    |
|                                                 | Katri Hämeen-Anttila, PhD, Head of Research and Development <ul style="list-style-type: none"> <li>- Finnish Medicines Agency Fimea, Kuopio, Finland</li> </ul>                                                                                                                                                                            |
|                                                 | Kenneth M. Shermock, PharmD, PhD, FASHP <ul style="list-style-type: none"> <li>- Center for Medication Quality and Outcomes, The Johns Hopkins Health System, Baltimore, MD, US</li> <li>- Center for Drug Safety and Effectiveness, The Johns Hopkins Bloomberg School of Public Health, Baltimore, MD, US</li> </ul>                     |
|                                                 | Pekka Kurki, MD, Adjunct professor <ul style="list-style-type: none"> <li>- University of Helsinki, Helsinki, Finland</li> </ul>                                                                                                                                                                                                           |
| <i>Corresponding author</i>                     | Hanna M. Tolonen <ul style="list-style-type: none"> <li>- Stenbäckinkatu 9, FI-00029 HUS, Finland.</li> <li>- E-mail: hanna.tolonen@hus.fi</li> <li>- Telephone: +358 505705371</li> <li>- OrcidID: <a href="https://orcid.org/0000-0002-6824-7566">https://orcid.org/0000-0002-6824-7566</a></li> </ul>                                   |

Word count: 3964

## ABSTRACT

### Objectives

To explore relevant Finnish stakeholders' perceptions on the automatic substitution of biological medicines with particular focus on medication safety and issues that need to be considered to create an appropriate model for automatic biologic product substitution.

### Design

Qualitative interview study

### Methods

Data were collected in semi-structured individual (n=17), pair (n=7) and group (n=8) interviews (32 interviews, 62 participants) in 2018. Participants represented a wide range of stakeholders involved in the pharmacotherapy process: community pharmacists (n=8 interviews), authorities (n=7), prescribers (n=7), pharmaceutical industry and wholesalers (n=6), patients / customers (n=2), hospital pharmacists (n=1) and nurses (n=1). Inductive content analysis was performed.

### Results

Benefits of automatic substitution were identified as cost savings, more patients receiving biological treatments and enhanced continuity of treatment. Six major risk categories were identified: 1) the patient's medication is interrupted or complicated temporarily or permanently, 2) the patient uses two products with the same active substance, 3) the traceability of the product is compromised, 4) the patient cannot get into healthcare in case of problems, 5) the patient does not receive substitution-related advice from a pharmacy, and 6) the patient is distracted by the support material he receives. Several risk mitigation measures were commonly mentioned: medication and device counselling by pharmacists (n=23), infrequent substitution interval (n=15), and better knowledge on biosimilars among healthcare providers (n=13).

### Conclusions

Automatic substitution of biologics is associated with risks that should be prospectively managed before implementing the procedure. The substitution also introduces new tasks and communication needs to those involved in actual medication use process, particularly to community pharmacists who will be responsible for substitution and counselling the patients.

### Keywords

Biosimilars, biological medicines, medication safety, automatic substitution, interchangeability

1  
2  
3  
4  
5  
6  
7  
8  
9  
10  
11  
12  
13  
14  
15  
16  
17  
18  
19  
20  
21  
22  
23  
24  
25  
26  
27  
28  
29  
30  
31  
32  
33  
34  
35  
36  
37  
38  
39  
40  
41  
42  
43  
44  
45  
46  
47  
48  
49  
50  
51  
52  
53  
54  
55  
56  
57  
58  
59  
60

### STRENGTHS AND LIMITATIONS OF THIS STUDY

- This is the first study to summarize medication safety risks to be prospectively managed while implementing automatic substitution of biologics.
- A wide range of stakeholders participated in the interviews offering their viewpoints.
- The limited number of patients and nurses in the interviews may have influenced the emphasis of the results.
- Interviews are an effective method to gain an in-depth understanding of important issues to be considered when designing a model for automatic substitution of biologics.
- The results may be relevant for other countries across the EU considering automatic substitution of biologics.

## INTRODUCTION

Biological medicines (“biologics”), especially therapeutic proteins, are used to treat an increasing number of patients over a wide range of therapeutic indications.<sup>1</sup> The high costs of original biological medicines represent a major burden on health care budgets.<sup>2</sup> The biosimilar concept with abbreviated approval pathway was developed in the EU to increase competition within biologics’ market.<sup>3</sup> Subsequently, biosimilars have triggered price competition and price reductions in several countries.<sup>4</sup> In Finland, hospitals have generally adopted biosimilars into their formularies mainly through their tendering processes.<sup>4-5</sup> However, in ambulatory care, the uptake of biosimilars has been poor.<sup>6</sup> In ambulatory care, the decision to switch between biologics is made by the prescriber and the incentives to switch from a biologic reference product to a biosimilar are weak: the social insurance reimbursement system covers the majority of expenses for the patient either way.<sup>5</sup>

The introduction of automatic generic substitution was an effective way to restrict the increase of medication expenditures when uptake of generic prescribing lagged.<sup>7-10</sup> From a regulatory perspective, the approaches to demonstrate equivalence of generic small molecule drugs and biosimilars are analogous; however, the requirements to demonstrate the similarity are more extensive for biosimilars.<sup>11</sup> This is due to the heterogeneity of the molecules produced by biotechnological processes.<sup>12</sup> Theoretical considerations and clinical switching studies suggest that biosimilars developed according to the EU guidance are interchangeable with their reference products.<sup>13-20</sup> Furthermore, no consistent safety signals from pharmacovigilance reporting systems that monitor switching between highly similar biologics have been identified.<sup>12, 21</sup>

Several prominent EU regulatory agencies, including Finnish Medicines Agency, and medical societies have issued position papers supporting the interchangeability of biosimilars with their reference products under the supervision of the prescriber.<sup>22</sup> However, since the marketing authorization process ensures that the biosimilar has the same efficacy and safety profile as the reference product, relevant changes in treatment are not expected upon switching.<sup>13</sup> Thus, in countries where biosimilars have been regarded as interchangeable, the (automatic) substitution is no longer a scientific question, but a political, practical and organizational issue. The aim of this study was to explore relevant Finnish stakeholders’ perceptions on the automatic substitution of biological medicines with the focus on medication safety. In the spirit of prospective risk management, our focus was to identify issues that should be considered to create an appropriate model for automatic biological medicine substitution.

## METHODS

Finnish stakeholders' perceptions on automatic substitution of biologics were explored by semi-structured theme interviews. This method is particularly suitable for situations where it is desirable to elicit a wide range of views on a specific topic.<sup>23</sup> The theme interview is also well suited for previously unstudied topics.<sup>24</sup>

### Interview guide and additional interview material

The flexible interview guide with four themes was developed (Supplement Material 1). The flexibility in the guide allowed a conversational and interactive approach in the interviews.<sup>23</sup> The themes were: 1) attitudes towards automatic substitution, 2) medication safety upon substitution, 3) prerequisites for implementation and specific issues pertaining to different perspectives, and 4) implementation and monitoring. The interview guide was constructed based on the study aim, and the research group's experience and knowledge that covered, for example, biosimilar policy making on the EU level, implementing the generic substitution at the national level as well as extensive medication safety research. In the interviews, a table of biosimilars that were on the market in Finland in August 2018, and a table of biosimilars authorized in the EU, but not launched in Finland were made available.

The interview guide was tested in a pilot interview. Based on the pilot, the explanations of the key terms used in the interview were added to the interview material. After this, the guide was adapted but kept open to further adjustments during the data collection, particularly regarding different stakeholder roles. The pilot interview was included in the research data.

### Sampling and recruitment of the interviewees

The study sample covered a full range of national stakeholders associated with biological medication starting from the marketing authorization to medicine distribution and patient care (Supplement Material 2). Purposive sampling was used to select the stakeholders to ensure the coverage of all relevant perspectives.<sup>25</sup> The following operators were included: community and hospital pharmacists, prescribers, nurses, patients/customers, pharmaceutical industry, pharmaceutical wholesalers, and different authorities regarding distribution and pharmacotherapy process.

Interviewees were primary recruited through interest groups, professional associations, and patient organizations. The aim of the interviews was to obtain rich and comprehensive insights from interviewees. The chosen organizations were contacted by email. The date and time for the interview were agreed by email or telephone. The invited organizations were given the opportunity to identify the person or persons

1  
2  
3 to participate the interview. Direct recruits were made in situations where it was appropriate (e.g.,  
4 authorities). A total of 38 interview invitations were sent.  
5  
6  
7  
8  
9

### 10 **Data collection**

11 Written informed consent was obtained from all interviewees. The interviews were audio recorded. The  
12 interviews were conducted by HMT (female pharmacist, M.Sc., with training in qualitative interviews) in  
13 Finnish at places that were easily reached by the interviewees and were sufficiently private to facilitate a  
14 free and confidential exchange of information.  
15  
16  
17  
18

19  
20 At the beginning of each interview, the interviewer went through the most important terms (biosimilar,  
21 substitution and medication safety) used in the interview to ensure that the concept would not cause any  
22 misunderstandings. Interviewees were encouraged to share their personal views and the possible positions  
23 of their background organization on the topic.  
24  
25  
26  
27

### 28 **Data analysis**

29  
30 Audio records were transcribed verbatim by a professional transcriber and transcripts were checked for  
31 accuracy by one researcher (HMT). The identities of the participants were anonymized prior to data  
32 analysis. Inductive content analysis, which is applicable for research topics which are not well-known and  
33 are expected to yield new insights, was used.<sup>26-27</sup> The data were read through several times and sentences  
34 relevant to research question were coded. Codes that had the same or similar meaning were combined.  
35 Combined codes were grouped into subcategories and further categories that formed, for example,  
36 perceived risk descriptions that were presented in a conceptual model. Suitability of the interchangeability  
37 for the biologics, as it is recognized in Finland, was not in the focus. The data were mainly analyzed by one  
38 researcher (HMT). There were several sessions with the research group where data, analysis and  
39 preliminary results were discussed to improve the trustworthiness of the qualitative analysis. The most  
40 representative quotations were reported. A checklist of the consolidated criteria for reporting qualitative  
41 studies was utilized when applicable.<sup>28</sup>  
42  
43  
44  
45  
46  
47  
48  
49  
50

### 51 **Ethical approval**

52 The interviews were conducted in accordance with the Finnish National Board of Research Integrity  
53 guidelines for the ethical principles to conduct a research.<sup>29</sup> Ethical pre-evaluation was not required, as all  
54 interviewees were asked for informed consent, only adults participated in the interviews and the interviews  
55 did not cover the interviewees' personal health information.  
56  
57  
58  
59  
60



## RESULTS

### Study participants

A total of 32 interviews with 62 participants were performed between August and November 2018 (Table 1). There were 17 individual interviews. The rest were either pair (n=7) or group (n=8) interviews. The mean duration of the interviews was 55 minutes (range from 30 to 98 minutes). All interviews were conducted face-to-face. In three interviews there were additional participants (n=4) also via Skype or over telephone.

Most of the contacted organizations and individuals agreed to participate in the study (n=32, 84%). Six contacts did not lead to an interview. Three invited stakeholders refused to participate due to lack of knowledge or experience on the topic and two participants dropped out since a suitable interview time was not found (group interviews). No response was received for one invitation. A summary of the characteristics of the participants is given in Table 1.

**Table 1** Number of interviews (n=32) and background of the interviewees (n=62).

| BACKGROUND OF THE INTERVIEWEES                                                                                                                                                                                             | NUMBER OF INTERVIEWS<br>(NUMBER OF INTERVIEWEES) |
|----------------------------------------------------------------------------------------------------------------------------------------------------------------------------------------------------------------------------|--------------------------------------------------|
| <b>COMMUNITY PHARMACISTS</b>                                                                                                                                                                                               | 8 (15)                                           |
| <ul style="list-style-type: none"> <li>National and/or local professional associations</li> <li>Practitioners (pharmacy owners, pharmacists; M.Sc and B.Sc)</li> </ul>                                                     |                                                  |
| <b>AUTHORITIES</b>                                                                                                                                                                                                         | 7 (18)                                           |
| <ul style="list-style-type: none"> <li>Legislation</li> <li>Evaluation of interchangeability of generics</li> <li>Pricing</li> <li>Surveillance of pharmacies</li> <li>Reimbursement</li> <li>Pharmacovigilance</li> </ul> |                                                  |
| <b>PRESCRIBERS</b>                                                                                                                                                                                                         | 7 (7)                                            |
| <ul style="list-style-type: none"> <li>Professional associations</li> <li>Practitioners from medical specialty societies</li> </ul>                                                                                        |                                                  |
| <b>PHARMACEUTICAL INDUSTRY AND WHOLESALERS</b>                                                                                                                                                                             | 6 (8)                                            |
| <ul style="list-style-type: none"> <li>National interest groups</li> <li>Pharmaceutical companies and wholesalers</li> </ul>                                                                                               |                                                  |
| <b>PATIENTS / CUSTOMERS</b>                                                                                                                                                                                                | 2 (5)                                            |
| <ul style="list-style-type: none"> <li>Patient associations</li> </ul>                                                                                                                                                     |                                                  |
| <b>HOSPITAL PHARMACISTS</b>                                                                                                                                                                                                | 1 (6)                                            |
| <ul style="list-style-type: none"> <li>Hospital drug formulary management</li> </ul>                                                                                                                                       |                                                  |
| <b>NURSES</b>                                                                                                                                                                                                              | 1 (3)                                            |
| <ul style="list-style-type: none"> <li>Specialist nurse associations</li> </ul>                                                                                                                                            |                                                  |
| <b>TOTAL</b>                                                                                                                                                                                                               | <b>32 (62)</b>                                   |

### **General perceptions of biological medicines' substitution**

1  
2  
3  
4  
5  
6  
7  
8  
9  
10  
11  
12  
13  
14  
15  
16  
17  
18  
19  
20  
21  
22  
23  
24  
25  
26  
27  
28  
29  
30  
31  
32  
33  
34  
35  
36  
37  
38  
39  
40  
41  
42  
43  
44  
45  
46  
47  
48  
49  
50  
51  
52  
53  
54  
55  
56  
57  
58  
59  
60

Practically all participants in the interviews (n=32) preferred physician-led switching as a primary method for enhancing the use of biosimilars, whereas varied attitudes regarding automatic substitution of biologics in community pharmacies were elicited. In half of the interviews (n=16), the position of the attendees was positive to the substitution at the pharmacy level. In 25% of the interviews (n=8), interviewees suggested that there is not enough experience on biosimilars, and they saw risks that should be solved prior to initiating automatic substitution in pharmacies. Automatic substitution of biologics was deemed as a totally inappropriate model in some interviews (n=8). Some negative comments reflected distrust on quality, safety, and efficacy of biosimilars in general. Positive and negative attitudes were both found among all stakeholders and all types of interviews (individual, pair or group interviews). Treatment naïve patients were perceived to be the most suitable for substitution.

### **Benefits of the automatic substitution of biologics**

In addition to cost-savings in health care (n=17), the stakeholders identified several other benefits that might be achieved with implementing biologics' substitution (Table 2). More patients can receive treatments, if savings result to increased number of patients on biological treatment (n=5), initiation of biological treatment in earlier phase (n=3) or introduction of novel treatments for new patients (n=2). Substantial price reductions may also increase patients' willingness and ability to use biologics (n=5), if the price reductions are substantial. Continuity of treatment was also identified as a potential benefit, for example, in the case of medicine shortages (n=4).

**Table 2** Potential benefits of substitution at the pharmacy level as identified in the interviews (n=32)

| Benefit                                     | Description of the benefit                                                                                                                                      | Citation from the interview                                                                                                                                                                                                                    |
|---------------------------------------------|-----------------------------------------------------------------------------------------------------------------------------------------------------------------|------------------------------------------------------------------------------------------------------------------------------------------------------------------------------------------------------------------------------------------------|
| <b>Savings</b>                              | Society saves on drug costs (n=17)                                                                                                                              | “.. that’s where the big money can be saved” PRESCRIBER06                                                                                                                                                                                      |
| <b>More patients can receive treatments</b> | Lower prices can improve patients' willingness and ability to use self-injectable biological products. (n=5)                                                    | “.. patient’s involvement in the treatment may be better if he/she gets a cheaper medicine, it is a bit of problem with expensive biological drugs before reaching annual limit for co-payment..” NURSE01                                      |
|                                             | Patients have better access to biological treatments. (n=5)                                                                                                     | “.. if we can get more use of these biosimilars and then lower prices then we will enable a larger number of patients to receive treatment..” AUTHORITY15                                                                                      |
|                                             | Patients may start biological treatment earlier. (n=3)                                                                                                          | “.. maybe one should not focus only on savings here but just how you can treat patients at an earlier stage..” INDUSTRY05                                                                                                                      |
|                                             | New drug treatments can be introduced without compromising sustainability of pharmacotherapy. (n=2)                                                             | “.. with the savings these innovative medicines can be offered to more patients..” PHARMACIST08                                                                                                                                                |
| <b>Continuity of treatments</b>             | Treatment can continue smoothly with another product if there is a medicine shortage. (n=4)                                                                     | “.. if they were in a kind of generic substitution, there would more tools for these disruptions.” PHARMACIST05                                                                                                                                |
|                                             | Decreasing prices can increase the pharmacy's willingness to keep the products in stock. (n=2)                                                                  | “And, of course, depending on which price category the product is, if it is always available in the pharmacy as for example insulin, as soon as patient gets his medicine , he can start using it immediately.” PHARMACIST01                   |
|                                             | Patients may receive a three-month dose of reimbursed medication at the same time if the price of the product falls sufficiently. (n=1)                         | “So if that price dropped so much that the customer would get it [dispensed medicine] more to take with, and on the other hand it would be a good thing for the customer not to visit pharmacy every month ..” PHARMACIST14                    |
|                                             | Treatment can continue smoothly with another reimbursed product if there is a change in the reimbursement status of the patient’s current medicine brand. (n=1) | “But even in this situation [the original product is not reimbursed any more] if you speculate that there is a drug substitution and you can switch directly to the biosimilar, so this recipe ‘exchange rally’ is much smaller.” PHARMACIST01 |
|                                             | Automatic substitution could improve immediate availability if pharmacies were aware of the product that has to be dispensed. (n=1)                             | “..for example, in this Neupogen case, you should keep four different products in stock when you don’t know what the doctor prescribes, but with the substitution you only need one product to start the treatment..” AUTHORITY18              |

## The perceived medication safety risks and their management

Most of the risks with biologics' substitution identified in the interviews were related to the interruption or complication of patient's pharmacotherapy because of issues such as inadequate knowledge of the administration device (n=19), medicine availability problems (n=12) or patient's distrust to the biosimilar medicine itself (n=11) (Table 3). For example, differences in packages and complex naming (n=11) can introduce a risk for duplicate therapy. Traceability of the dispensed product name and batch number (due to long-term side effects; n=8, or unavailability of the dispensed product name or batch number; n=5), and insufficient availability of healthcare contacts (n=12) were also identified as medication safety risks in substitution in several comments. Lack of appropriate training for patients in the pharmacy and the inconsistencies between the pharmaceutical product-specific patient information materials were mentioned as risks in some interviews.

Several methods to minimize medication safety risks were proposed in the interviews. Medication and device counselling provided by pharmacists (n=23), infrequent substitution interval (n=15), and better knowledge on biosimilars among healthcare providers (n=13) were identified as potential remedies in multiple interviews.

**Table 3** Perceived medication safety risks and their management measures as identified in the interviews (n=32).

| Potential risk                                                                    | Descriptions of perceived risks with manifestation                                                                                                                                                                                                                                                                                                                                                                                                                                        | Methods to minimize risk as identified in the interviews (n=32)                                                                                                                                                                                                                                                                                                                                                                                                                                                                                                                                                                                                                                                                                                                                                                                                                                                                                                                                                                                                                                                                                                                                                                                                                                                                                                                                                                                                                                                                                                                                                                     |
|-----------------------------------------------------------------------------------|-------------------------------------------------------------------------------------------------------------------------------------------------------------------------------------------------------------------------------------------------------------------------------------------------------------------------------------------------------------------------------------------------------------------------------------------------------------------------------------------|-------------------------------------------------------------------------------------------------------------------------------------------------------------------------------------------------------------------------------------------------------------------------------------------------------------------------------------------------------------------------------------------------------------------------------------------------------------------------------------------------------------------------------------------------------------------------------------------------------------------------------------------------------------------------------------------------------------------------------------------------------------------------------------------------------------------------------------------------------------------------------------------------------------------------------------------------------------------------------------------------------------------------------------------------------------------------------------------------------------------------------------------------------------------------------------------------------------------------------------------------------------------------------------------------------------------------------------------------------------------------------------------------------------------------------------------------------------------------------------------------------------------------------------------------------------------------------------------------------------------------------------|
| The patient's medication is interrupted or complicated temporarily or permanently | <b>The patient does not know how or is unable to use the administration device correctly (n=19)</b> <ul style="list-style-type: none"> <li>The patient feels that the new administration device is difficult to use.</li> <li>Patient fails to administer medicine or he/she is not able to repeat administration</li> <li>New administration device is not suitable for the patient (handicap, visual impairment)</li> <li>Too wide a range of different devices is available</li> </ul> | <ul style="list-style-type: none"> <li>Pharmacy provides medication counselling including device counselling with optional injection training (n=23)</li> <li>The interval* between substitutions should be longer for biological drugs than for generic medicines (n=15)</li> <li>Further training of healthcare professionals on biosimilars (n=13)</li> <li>Consistent, positive attitude towards substitution across healthcare and pharmacies (n=9)</li> <li>A motivating conversation with the patient by a doctor and nurse (n=8)</li> <li>Ensuring at every pharmacy and health care visit that the patient can use the device correctly (n=8)</li> <li>Medication monitoring (n=8)</li> <li>The patient knows where to contact in case of problems (n=7)</li> <li>Prescriber can prohibit substitution if necessary (n=7)</li> <li>Evaluation of the interchangeability of devices in a regulatory process (n=6)</li> <li>Dispensing of biologics based on an appointment or pre-order (n=6)</li> <li>Switches and substitution are avoided if medication has not in stabilized (n=6)</li> <li>Evaluation of biological medicines suitable for substitution by the regulatory authority (n=6)</li> <li>Post-marketing surveillance of medicines (n=5)</li> <li>Regional co-ordination / co-operation between healthcare and pharmacies (n=4)</li> <li>Substitution policy prevents shortages by supporting pharmaceutical companies to anticipate the market (n=3)</li> <li>Mandatory reserve supplies of biological medicines (n=2)</li> <li>Providing reliable drug information sources for the patient (n=2)</li> </ul> |
|                                                                                   | <b>The medicine is not available at the right time (n=12)</b> <ul style="list-style-type: none"> <li>The pharmacy does not have the product in stock</li> <li>There is a medicine shortage</li> </ul>                                                                                                                                                                                                                                                                                     |                                                                                                                                                                                                                                                                                                                                                                                                                                                                                                                                                                                                                                                                                                                                                                                                                                                                                                                                                                                                                                                                                                                                                                                                                                                                                                                                                                                                                                                                                                                                                                                                                                     |
|                                                                                   | <b>The patient does not trust the new medicine (n=11)</b> <ul style="list-style-type: none"> <li>The patient has benefited significantly from the original product and does not want to change.</li> <li>The patient receives conflicting messages from different healthcare professionals.</li> <li>The substitution will surprise the patient at the pharmacy.</li> <li>Patient is suspicious due to different product appearance and trade names.</li> </ul>                           |                                                                                                                                                                                                                                                                                                                                                                                                                                                                                                                                                                                                                                                                                                                                                                                                                                                                                                                                                                                                                                                                                                                                                                                                                                                                                                                                                                                                                                                                                                                                                                                                                                     |
|                                                                                   | <b>The patient experiences adverse reactions after substitution (n=11)</b> <ul style="list-style-type: none"> <li>Reactions to excipients</li> <li>Nocebo-effect</li> <li>Large-scale substitution may reveal problems that were not previously detected</li> </ul>                                                                                                                                                                                                                       |                                                                                                                                                                                                                                                                                                                                                                                                                                                                                                                                                                                                                                                                                                                                                                                                                                                                                                                                                                                                                                                                                                                                                                                                                                                                                                                                                                                                                                                                                                                                                                                                                                     |
|                                                                                   | <b>Concern about losing the medicine's effectiveness (n=8)</b> <ul style="list-style-type: none"> <li>The development of drug antibodies is accelerated by repetitive switches</li> <li>There is no large-scale experience on repetitive switches</li> </ul>                                                                                                                                                                                                                              |                                                                                                                                                                                                                                                                                                                                                                                                                                                                                                                                                                                                                                                                                                                                                                                                                                                                                                                                                                                                                                                                                                                                                                                                                                                                                                                                                                                                                                                                                                                                                                                                                                     |
| The patient uses two products with the same active substance                      | <b>Based on the appearance or name of the product, it is not possible to determine whether the active substance is the same (n=11)</b> <ul style="list-style-type: none"> <li>Different appearance of packages</li> <li>Different trade names</li> <li>Generic names can be confusing</li> <li>Patient recognises only the established brand name</li> </ul>                                                                                                                              | <ul style="list-style-type: none"> <li>Demonstrating administration devices in drug counselling (visuality) (n=9)</li> <li>Prescriber can prohibit substitution (n=7)</li> <li>Printing drug lists and checking medication (n=1)</li> <li>The new product is marked with a label that indicates the substitution (n=1)</li> <li>The new product is not delivered too early, so the patient does not have two products at the same time at home. (n=1)</li> <li>Pharmacist invalidates the previous prescription when substituting (n=1)</li> </ul>                                                                                                                                                                                                                                                                                                                                                                                                                                                                                                                                                                                                                                                                                                                                                                                                                                                                                                                                                                                                                                                                                  |
|                                                                                   | <b>The patient does not understand that substitution has taken place (n=8)</b>                                                                                                                                                                                                                                                                                                                                                                                                            |                                                                                                                                                                                                                                                                                                                                                                                                                                                                                                                                                                                                                                                                                                                                                                                                                                                                                                                                                                                                                                                                                                                                                                                                                                                                                                                                                                                                                                                                                                                                                                                                                                     |

| Potential risk                                                                  | Descriptions of perceived risks with manifestation                                                                                                                                                                                                                                                                                                                                                                                                     | Methods to minimize risk as identified in the interviews (n=32)                                                                                                                                                                                                                                                                                                                                                                                                                                                                                                                                                                                                                                                                                   |
|---------------------------------------------------------------------------------|--------------------------------------------------------------------------------------------------------------------------------------------------------------------------------------------------------------------------------------------------------------------------------------------------------------------------------------------------------------------------------------------------------------------------------------------------------|---------------------------------------------------------------------------------------------------------------------------------------------------------------------------------------------------------------------------------------------------------------------------------------------------------------------------------------------------------------------------------------------------------------------------------------------------------------------------------------------------------------------------------------------------------------------------------------------------------------------------------------------------------------------------------------------------------------------------------------------------|
|                                                                                 | <ul style="list-style-type: none"> <li>Patients with polypharmacy, the elderly, patients with impaired cognition</li> </ul> <p><b>The patient has two prescriptions for the same active substance (n=3)</b></p> <ul style="list-style-type: none"> <li>The patient has a prescription for the original product and another prescription for the biosimilar</li> </ul>                                                                                  |                                                                                                                                                                                                                                                                                                                                                                                                                                                                                                                                                                                                                                                                                                                                                   |
| <b>The traceability of the product is compromised.</b>                          | <p><b>The biological drug can have long term side effects (n=8)</b></p> <ul style="list-style-type: none"> <li>The product that caused a side effect cannot be traced</li> </ul> <p><b>In case of a side effect, the product cannot be traced (n=5)</b></p> <ul style="list-style-type: none"> <li>The physician is not aware of what brand and what batch the patient has used</li> <li>Patient refers only to the originator's brand name</li> </ul> | <ul style="list-style-type: none"> <li>The interval between substitutions should be longer for biologics than for generic medicines (n=15)</li> <li>Promoting two-way information sharing between pharmacy and health care services (n=10)</li> <li>Switches and substitution are avoided if medication has not stabilized (n=6)</li> <li>Introduction of a drug certification system (automatic registration of the dispensed package and batch) (n=6)</li> <li>Development of information systems so that the batch number of the delivered product is also registered in the electronic prescription center (n=4)</li> <li>Prescriber can check the brand name of the supplied medicine at the electronic prescription center (n=3)</li> </ul> |
| <b>The patient cannot get into healthcare in case of problems</b>               | <p><b>Health care is overloaded due to substitution (n=12)</b></p> <ul style="list-style-type: none"> <li>Substitution increases patient contact with health care</li> <li>Patients with substituted medicine would be in closer follow-up</li> </ul> <p>The patient contacts the physician to obtain a substitution refusal</p>                                                                                                                       | <ul style="list-style-type: none"> <li>Further training of healthcare professionals on biosimilars (n=13)</li> <li>Consistent, positive attitude towards substitution across healthcare and various pharmacies (n=9)</li> <li>A motivating conversation with the patient by a doctor and nurse (n=8)</li> </ul>                                                                                                                                                                                                                                                                                                                                                                                                                                   |
| <b>The patient does not receive substitution-related advice from a pharmacy</b> | <p><b>'On behalf of the patient' customers (n=5)</b></p> <ul style="list-style-type: none"> <li>For example, a relative can apply for a medicine on behalf of a patient</li> </ul> <p><b>New methods to dispense medicines (n=1)</b></p> <ul style="list-style-type: none"> <li>The patient can apply for a medicine from the "smart box" when convenient</li> </ul>                                                                                   | <ul style="list-style-type: none"> <li>Medication counselling with both visual and written material (n=7)</li> <li>Prescriber can prohibit substitution (n=7)</li> </ul>                                                                                                                                                                                                                                                                                                                                                                                                                                                                                                                                                                          |
| <b>The patient is distracted by the support material he receives</b>            | <p><b>There may be differences in written material received by the patient (n=2)</b></p> <ul style="list-style-type: none"> <li>Material for various products is accumulated</li> </ul> <p><b>The availability of additional materials may vary by product (n=2)</b></p> <ul style="list-style-type: none"> <li>Pharmaceutical company supplies additional product-specific material such as web pages, storage and shipping boxes, etc.</li> </ul>    | <ul style="list-style-type: none"> <li>Generic and harmonized risk minimization materials (n=2)</li> </ul>                                                                                                                                                                                                                                                                                                                                                                                                                                                                                                                                                                                                                                        |

\* In Finland, the substitution interval for generic small molecules (generic substitution interval) e.g. how often patient's medicine could be substituted at the pharmacy, is related to the reference price that establish the reimbursement level, and is confirmed quarterly (reference price interval).<sup>73</sup>

### Substitution frequency

The interviewees were asked about optimal substitution interval for biologics. Only three interviewees agreed that the current generic substitution interval of three months (e.g. how often the medicine could be substituted in the pharmacy<sup>5</sup>) would be suitable for biologics and none recommended to have an interval of one month. The most popular interval for substitution was 12-24 months (n=13). In some interviews the participants did not want to mention any precise frequency but mentioned that it “should be done rarely”. Both the validity period of a prescription and the adjusted reference price intervals for biologics were suggested to determine the interval of biologics’ substitution.

Participants suggested a correlation between substitution frequency and medication safety and pharmaceutical market attractiveness (Table 4). It was suggested that a long substitution interval may increase medication safety compared to shorter intervals. On the other hand, pharmaceutical companies’ interest to enter local pharmaceutical market may be compromised if the substitution interval is too long.

**Table 4** Influence of the substitution frequency on medication safety and attractiveness of the pharmaceutical market in Finland emphasized in the stakeholders’ interviews (n=32).

|                                                | SHORT SUBSTITUTION INTERVAL                                                                                                                                                                                                                                                                                                                                                                                                    | LONG SUBSTITUTION INTERVAL                                                                                                                                                                                                                                                                                                                                  |
|------------------------------------------------|--------------------------------------------------------------------------------------------------------------------------------------------------------------------------------------------------------------------------------------------------------------------------------------------------------------------------------------------------------------------------------------------------------------------------------|-------------------------------------------------------------------------------------------------------------------------------------------------------------------------------------------------------------------------------------------------------------------------------------------------------------------------------------------------------------|
| <b>Medication safety</b>                       | <p><b>Positive impact on</b></p> <ul style="list-style-type: none"> <li>Continuation of treatment in case of shortages of a particular product</li> </ul> <p><b>Negative impact on</b></p> <ul style="list-style-type: none"> <li>Device expertise of the patient</li> <li>Traceability of the product and batch number</li> <li>Management of support material for the patient</li> <li>Concerns on immunogenicity</li> </ul> | <p><b>Positive impact on</b></p> <ul style="list-style-type: none"> <li>Device expertise of the patient</li> <li>Traceability of the product and batch number</li> <li>Management of additional patient material</li> </ul> <p><b>Negative impact on</b></p> <ul style="list-style-type: none"> <li>Continuity of treatment in case of shortages</li> </ul> |
| <b>Attractiveness of pharmaceutical market</b> | <p><b>Negative impact on</b></p> <ul style="list-style-type: none"> <li>Predictability of pharmaceutical market</li> <li>Stock management in pharmacies</li> </ul> <p><b>Uncertain impact on</b></p> <ul style="list-style-type: none"> <li>Competition between products</li> </ul>                                                                                                                                            | <p><b>Positive impact on</b></p> <ul style="list-style-type: none"> <li>Predictability of pharmaceutical market</li> <li>Stock management in pharmacies</li> </ul> <p><b>Negative impact on</b></p> <ul style="list-style-type: none"> <li>Competition between products (prevents rapid reaction to price changes)</li> </ul>                               |

### Tasks and responsibilities of the patients and health care professionals

Automatic substitution was predicted to bring new tasks to community pharmacists (Figure 1). Lack of information sharing between community pharmacists and nurses who are involved in patient counselling was noted in several interviews. It was highlighted by interviewees that this information pathway should be developed for effective and consistent counselling on administration devices for patients. Multiple interviewees stated that collaboration between teams in healthcare and pharmacies should be improved before introducing automatic substitution of biologics. On the other hand, patients' role as a partner was discussed by the various interviewees.

*Add Figure 1 here.*

For peer review only



1  
2  
3  
4  
5  
6  
7  
8  
9  
10  
11  
12  
13  
14  
15  
16  
17  
18  
19  
20  
21  
22  
23  
24  
25  
26  
27  
28  
29  
30  
31  
32  
33  
34  
35  
36  
37  
38  
39  
40  
41  
42  
43  
44  
45  
46  
47  
48  
49  
50  
51  
52  
53  
54  
55  
56  
57  
58  
59  
60

## DISCUSSION

The stakeholders had a generally positive attitude to the biologics' substitution at the pharmacy level. Treatment naïve patients were regarded as the most suitable targets for substitution. The stakeholders identified several benefits and risks related to automatic substitution of biologics. Many of the risks that were identified in the interviews are applicable also to generic substitution, such as patients' distrust towards a new medicine and a parallel use of the same active ingredients in different products (Table 3). Traceability of the dispensed product name and batch number, and patients' knowledge and training for a new administration device were identified as risks that are not shared with generic substitution. On the other hand, multiple mitigation measures against medication safety hazards were also identified, such as infrequent substitution interval, improved knowledge of biosimilars among healthcare personnel and administration device counselling at pharmacies. These measures can allocate some new tasks to community pharmacists.

### Education of healthcare providers and patient counselling

Our study indicates that the personnel in healthcare units and community pharmacies need substantial detailed information on biosimilars, which is consistent to previous findings.<sup>30-32</sup> The outcome of automatic substitution may be negatively influenced if the provided information is ambiguous or not sufficiently detailed.<sup>33</sup> The attitudes of the prescriber or other providers towards substitution have been shown to have an impact on the patient's acceptance to switch medicine and the perceived outcome of the switch.<sup>34-35</sup> In generic substitution, lack of appropriate information has been shown to be confusing and raise doubts regarding the quality, safety and efficacy of the generic product.<sup>36-38</sup>

Regarding the experience of generic substitution, it is important to provide consistent information to patients about biosimilars, the reasons for the switch, and the product in question. Based on the assessment by the regulatory authorities, the marketing authorization holder may be required to produce risk minimization material, such as patient "alert cards" used to manage the adequate monitoring of treatment.<sup>39</sup> In general, the risk minimization material of biosimilars should be consistent with the information of the reference product. In order to avoid confusion among patients, these materials should be as harmonized as possible.<sup>39</sup>

Our study identified potentially new roles for community pharmacists to facilitate safe and effective substitution of biologics. In Finland, the patient counselling on any biological medicine is usually given by the prescribers and nurses. Pharmacists are obligated by law to ensure that the patients know the

1  
2  
3 appropriate use of medicinal products, including administration devices.<sup>40</sup> Thus, all suggested new roles are  
4 already within the current mandate of the Finnish pharmacies. Nevertheless, it seems that introducing the  
5 substitution of biologics would require a major effort to educate and train pharmacy staff in dealing with  
6 biologics and their administration devices as well as in patient counselling. General information on  
7 biosimilars and their interchangeability is available in local languages and can be tailored to the needs of  
8 the pharmacies.<sup>41</sup> Ideally, pharmacies and local health care units should collaborate in developing patient  
9 counselling materials and techniques in order to increase synergy and to avoid overlapping work.  
10  
11  
12  
13  
14  
15  
16  
17

### 18 **Administration devices**

19  
20 According to our findings, patient's knowledge of use of the administration devices is one of the key factors  
21 to the success of substitution. The different administration devices can present an obstacle to switching.<sup>42</sup>  
22 However, all administration devices for biosimilars and their reference products have been tested for  
23 usability at the time of marketing authorization.<sup>43</sup> Thus, differences between the administration devices  
24 should not preclude substitution, provided that a proper dose can be administered by the caregiver or  
25 patient. The national authority will need to assess the suitability of administration devices for substitution  
26 in all relevant patient groups. For instance, substitution may involve the use of a different type of device,  
27 such as an autoinjector instead of a prefilled syringe. The use of different types of administration devices is  
28 very unlikely to cause clinically relevant problems as long as adequate patient counselling, including device  
29 training, has been given, the dose response curve is shallow, or the patient/caregiver can monitor the  
30 treatment effect (as in diabetes). The pharmacy staff should be able to provide the necessary device  
31 training if the patient or caregiver is unfamiliar with the new device in order to ensure the appropriate  
32 administration of the product.  
33  
34  
35  
36  
37  
38  
39  
40  
41  
42  
43  
44

### 45 **"Dispense as written"**

46  
47 According to previous studies, physicians have reservations regarding automatic substitution.<sup>44-49</sup> Some  
48 physicians seem to be hesitant to accept automatic substitution of biologics because of the perceived  
49 limitation of the physician's autonomy.<sup>50-51</sup> This was also identified in recent Finnish study.<sup>52</sup> This view can  
50 be challenged, since substitution of biosimilars, like generic substitution, deals with therapeutically  
51 equivalent products. The need for automatic substitution is driven by insufficient cost consciousness of  
52 prescribers who are major players in the channeling of public funds.<sup>53</sup>  
53  
54  
55  
56  
57

58 Nevertheless, there may be situations in which substitution is not appropriate. According to the local  
59 legislation, the prescribers can prohibit generic substitution by writing the prescription with a "dispense as  
60

1  
2  
3 written" designation.<sup>34, 54-55</sup> The interviewees in our study suggested that this may also be necessary in  
4 substitution of biologics. For instance, the patient may not have reached an optimal treatment response  
5 with the present medicinal product. In this case, substitution needs to be postponed until a rational  
6 decision can be made either to substitute or to prescribe a product with a different active substance.  
7  
8 Substitution may also be inappropriate if the patient will not be able to use the new product due to physical  
9 handicap or other relevant reasons. Nevertheless, the patients and healthcare providers may also consider  
10 a new device as easier to use.<sup>56-58</sup> It is important that the physicians will have to present a clinically sound  
11 justification if they wish to prohibit the substitution.  
12  
13  
14  
15  
16  
17  
18  
19

### 20 **Substitution interval**

21  
22 One of the concerns related to substitution was related to the frequency of switches. The stakeholders  
23 seemed to favor longer switching intervals for practical and safety reasons. Frequent switching could  
24 overload the pharmacies in patient counselling and increase the risk of medication errors and potential  
25 switch-related adverse effects, such as placebo effect. Multiple switches may also confuse patients and  
26 their caregivers.<sup>42</sup> Troubleshooting may also be difficult in cases of frequent switching and adverse effects  
27 with long latency, such as immunogenicity and loss of efficacy. A long switching interval may also increase  
28 the predictability of the market and simplify the logistics and the management of the stock in the  
29 pharmacies, especially for expensive biologics with limited shelf life. Thus, the optimal substitution interval  
30 for biologics should be determined by several factors, both theoretical and practical.  
31  
32  
33  
34  
35  
36  
37  
38  
39

### 40 **Traceability**

41  
42 Traceability has been presented as a problem of biosimilar uptake, especially upon substitution.<sup>59</sup> In  
43 contrast to general perception, traceability of biosimilars and their reference products has been shown to  
44 be adequate.<sup>60</sup> The main challenge in traceability of all biologics is the poor reporting of the batch numbers  
45 by healthcare personnel. In contrast, the pharmacies in Finland are already obligated to record the batch  
46 numbers of all dispensed biological medicines.<sup>61</sup> Thus, there is a good argument that traceability would be  
47 optimized at the pharmacy level. One issue that needs to be overcome, however, is that this information is  
48 not automatically transferred to patient records. Nonetheless in Finland, it is possible for a prescriber to  
49 find the brand name of the dispensed medicine in the electronic archive of prescriptions.<sup>62</sup> Similar helpful IT  
50 systems may be available or in development in other countries. In addition, traceability will be further  
51 improved in the EU by the recently introduced unique identifiers of all packages of prescribed medicinal  
52  
53  
54  
55  
56  
57  
58  
59  
60

1  
2  
3 products.<sup>63</sup> Nevertheless, the information flow between the health care units and community pharmacies  
4 should be improved.  
5  
6  
7  
8

### 9 **Practical and policy implications**

10  
11 The marketing authorization of biosimilar therapeutic proteins is based on the recommendation of the  
12 European Medicines Agency and granted by the European Commission whereas the interchangeability and  
13 substitutability are under responsibility of EU Member States.<sup>64</sup> Thus, each Member State has to develop its  
14 own procedures to assess interchangeability. For example in Finland, automatic substitution of generics is  
15 assessed for each new product entering the market.<sup>65</sup> A separate assessment of substitutability needs to be  
16 done in EU Member states for every new biosimilar as well if substitution is pursued. This assessment  
17 should include the dosage forms, administration devices and available product information. Instead, in the  
18 United States, interchangeability of biologics is considered as an extension of the biosimilar status including  
19 additional clinical switching studies.<sup>66</sup> In states where legislation allows, pharmacist can substitute products  
20 with interchangeability status.<sup>66-67</sup> Substitution is allowed in some other countries, for example in France  
21 and Australia.<sup>68</sup> Despite the legal basis, clear guidance for substitution practice and patient counselling is  
22 needed.<sup>69</sup>  
23  
24  
25  
26  
27  
28  
29  
30  
31

32 Small price difference between reference product and biosimilar is not encouraging physicians to switch.<sup>52</sup>  
33 However, substitution between the reference products and their biosimilars may be crucial not only for  
34 savings and price competition but also for practical and logistical reasons of limiting the number of  
35 products that must be stocked in the pharmacy.<sup>67</sup>  
36  
37  
38  
39  
40  
41

### 42 **Needs for further research**

43  
44 Considering substitution in practice, it may be appropriate to pilot the chosen model for substitution before  
45 adopting the policy in full-scale. Practical, safety, and economical aspects should be monitored and studied  
46 during the pilot phase in order to obtain comprehensive understanding of substantial benefits and risks as  
47 well as market dynamics associated with implementing substitution for biologics.  
48  
49  
50

51  
52 This study pointed out that pharmacist provided patient counselling is an important factor to ensure the  
53 medication safety in biologics' substitution. Despite the emerging biologic substitution experience in some  
54 countries, the content of the information that community pharmacists should provide to the patients and  
55 caregivers has not been studied nor reported.<sup>68-70</sup>  
56  
57  
58  
59  
60

### Strengths and limitations of the study

The community pharmacists and authorities constituted the majority of the participants in the interviews. Within both perspectives, the interviewees' backgrounds were very diverse (table 1). The limited number of patients and nurses in the interviews may have emphasized the perspectives of the other stakeholders. However, pharmacies are in the key position in executing substitution. Furthermore, interviews were conducted either as individual, pair or group interviews. Interactions between participants in the same interview have an impact on outcome of the interview.<sup>71</sup> Similar to all qualitative research, it is not possible to fully remove researcher bias. It should be noted that the results reflect the local circumstances in Finland and may not as such be applicable to other EU countries. However, the majority of issues covered here are common to many European health care systems.

### CONCLUSIONS

Perceptions of the stakeholders on automatic substitution for biologics at the pharmacy level were more positive than in previous studies. Several reservations were presented, and risk mitigation measures were deemed necessary.

The identified medication safety risks can be mitigated by an appropriate substitution model developed in collaboration with relevant stakeholders and piloted in pharmacies. Each biosimilar product should be assessed for the critical factors, such as relevant product information (in relation to substitution), presentations, and administration devices. The substitution also introduces new tasks and communication needs to those involved in actual medication use process, particularly to community pharmacists who will be responsible for substitution and counselling the patients. Electronic systems, such as electronic prescribing, pharmacy IT systems, and unique identifiers of packages, are helpful for traceability. Consistent and unbiased information should be made available to all substitution stakeholders. The clinical and economical outcomes of substitution should be monitored after institution of routine substitution.

### ACKNOWLEDGEMENTS

We thank all the participants in the interviews. We would like to warmly thank the project group in Finnish Medicines Agency Fimea.

### CONTRIBUTORS

1  
2  
3 HMT, MA, PR, KHA and PK contributed to the conception or study design. HMT was principal investigator to  
4 acquire and analyze the data, and draft the manuscript. All authors participated in interpretation of the  
5 data and critical revision of the manuscript. All authors approved the final version.  
6  
7  
8  
9

## 10 **FUNDING**

11  
12  
13 This work was funded by Finnish Medicines Agency Fimea and supported by University Pharmacy, Helsinki,  
14 grant.  
15  
16  
17

## 18 **COMPETING INTERESTS**

19  
20  
21 HMT has participated a congress for which participation fee was sponsored by Roche Oy  
22  
23  
24  
25

## 26 **PATIENT CONSENT**

27  
28  
29 Not required.  
30  
31  
32

## 33 **DATA SHARING**

34  
35  
36 All requests should be directed to the corresponding author.  
37  
38  
39  
40  
41  
42  
43  
44  
45  
46  
47  
48  
49  
50  
51  
52  
53  
54  
55  
56  
57  
58  
59  
60

## REFERENCES

- 1 European Commission, DG Enterprise and industry. What you need to know about biosimilar medicinal products. Process on corporate responsibility in the field of pharmaceuticals access to medicines in Europe. A consensus information document, 2013. <https://ec.europa.eu/docsroom/documents/8242/attachments/1/translations/en/renditions/pdf> (accessed Apr 2019)
- 2 Blackstone EA, Fuhr JP. The economics of biosimilars. *Am Health Drug Benefits*2013;6:469-78.
- 3 European Medicines Agency. Guideline on similar biological medicinal products CHMP/437/04 Rev 1, 2014. [https://www.ema.europa.eu/documents/scientific-guideline/guideline-similar-biological-medicinal-products-rev1\\_en.pdf](https://www.ema.europa.eu/documents/scientific-guideline/guideline-similar-biological-medicinal-products-rev1_en.pdf). (accessed Dec 2018)
- 4 IQVIA. The Impact of Biosimilar competition in Europe 2018. <https://ec.europa.eu/docsroom/documents/31642> (accessed Apr 2019)
- 5 Finnish Medicines Agency and Social Insurance Institution. Finnish Statistics on Medicine 2017. <http://urn.fi/URN:NBN:fi-fe2018112148808> (accessed Apr 2019)
- 6 Ruokoniemi P. Rational prescribing, dispensing and use of medicines in current and future healthcare and social welfare structures. Reports and Memorandums of the Ministry of Social Affairs and Health 12/2018, Helsinki: Ministry of Social Affairs and Health 2018
- 7 Mansilla C, Cárdenas J, Kaplan WA, *et al*. Evaluation of the effects of a generic substitution policy implemented in Chile. *BMJ Glob Health*2019;2:e000922. doi:10.1136/bmjgh-2018-000922
- 8 Aalto-Setälä V. The impact of generic substitution on price competition in Finland. *Eur J Health Econ*2008;9:185-91.
- 9 Andersson K, Sonesson C, Petzold M, *et al*. What are the obstacles to generic substitution? An assessment of the behaviour of prescribers, patients and pharmacies during the first year of generic substitution in Sweden. *Pharmacoepidemiol Drug Saf*2005;14:341-8.
- 10 Stadhouders N, Kruse F, Tanke M, *et al*. Effective healthcare cost-containment policies: A systematic review. *Health Policy*2019;123:71-9. doi: 10.1016/j.healthpol.2018.10.015.
- 11 van der Plas RM, van Zwieten-Boot BJ, Hoefnagel M, *et al*. The EU regulatory approach to generics and biosimilars is essentially similar. *GABI Journal*2015;4:9-10. doi: 10.5639/gabij.2015.0401.004
- 12 European Medicines Agency and European Commission. Biosimilars in the EU. Information guide for healthcare professionals. European Medicines Agency, 2017. [https://www.ema.europa.eu/en/documents/leaflet/biosimilars-eu-information-guide-healthcare-professionals\\_en.pdf](https://www.ema.europa.eu/en/documents/leaflet/biosimilars-eu-information-guide-healthcare-professionals_en.pdf) (accessed Apr 2019)
- 13 Kurki P, van Aerts L, Wolff-Holz E, *et al*. Interchangeability of Biosimilars: A European Perspective. *BioDrugs*2017;31:83-91. doi:10.1007/s40259-017-0210-0 [published Online First: 24 January 2017].
- 14 Cohen HP, Blauvelt A, Rifkin RM, *et al*. Switching reference medicines to biosimilars: a systematic literature review of clinical outcomes. *Drugs*2018;78:463-78. doi: 10.1007/s40265-018-0881-y [published Online First: 3 March 2018].
- 15 Inotai A, Prins CPJ, Csanádi M, *et al*. Is there a reason for concern or is it just hype? - A systematic literature review of the clinical consequences of switching from originator biologics to biosimilars. *Expert Opin Biol Ther*2017;17:915-26. doi: 10.1080/14712598.2017.1341486



- 1  
2  
3 16 McKinnon R, Cook M, Liauw W, et al. Biosimilarity and Interchangeability: Principles and Evidence: A  
4 Systematic Review. *BioDrugs*2018;32:27-52, 2018. doi: 10.1007/s40259-017-0256-z  
5  
6 17 Blackwell K, Semiglazov V, Krasnozhan D, et al. Comparison of EP2006, a filgrastim biosimilar, to the  
7 reference: a phase III, randomized, double-blind clinical study in the prevention of severe neutropenia in  
8 patients with breast cancer receiving myelosuppressive chemotherapy. *Ann Oncol*2015;26:1948-53. doi:  
9 10.1093/annonc/mdv281.  
10  
11 18 Blauvelt A, Lacour JP, Fowler JF, et al. Phase III randomized study of the proposed adalimumab biosimilar  
12 GP2017 in psoriasis: impact of multiple switches. *Br J Dermatol*2018;179:623-31. doi: 10.1111/bjd.16890.  
13  
14 19 Glintborg B, Loft AG, Omerovic E, et al. To switch or not to switch: results of a nationwide guideline of  
15 mandatory switching from originator to biosimilar etanercept. One-year treatment outcomes in 2061  
16 patients with inflammatory arthritis from the DANBIO registry. *Ann Rheum Dis*2019;78:192-200, doi:  
17 10.1136/annrheumdis-2018-213474.  
18  
19 20 Griffiths CEM, Thaçi D, Gerdes S, et al. The EGALITY study: a confirmatory, randomized, double-blind  
20 study comparing the efficacy, safety and immunogenicity of GP2015, a proposed etanercept biosimilar, vs.  
21 the originator product in patients with moderate-to-severe chronic plaque-type psoriasis. *Br J*  
22 *Dermatol*2017;176:928-38. doi: 10.1111/bjd.15152.  
23  
24 21 Trifiro G, Marciano I, Ingrasciotta Y. Interchangeability of biosimilar and biological reference product:  
25 updated regulatory positions and pre- and post-marketing evidence. *Expert Opin Biol Ther* 2018;18:309-15  
26  
27 22 Medicines for Europe. Positioning statements on physician-led switching for biosimilar medicines.  
28 Updated Jan 2019. [https://www.medicinesforeurope.com/wp-content/uploads/2017/03/M-Biosimilars-](https://www.medicinesforeurope.com/wp-content/uploads/2017/03/M-Biosimilars-Overview-of-positions-on-physician-led-switching.pdf)  
29 [Overview-of-positions-on-physician-led-switching.pdf](https://www.medicinesforeurope.com/wp-content/uploads/2017/03/M-Biosimilars-Overview-of-positions-on-physician-led-switching.pdf) (accessed Apr2019)  
30  
31 23 Mason J. Semistructured interview. In: Lewis-Beck MS, Bryman A, Futing Liao T, eds. The SAGE  
32 Encyclopedia of Social Science Research Methods. Sage Publications, Inc., Thousand Oaks, 2011.  
33 <http://sk.sagepub.com/reference/socialscience> (accessed Apr 2019)  
34  
35 24 Edwards R, Holland J. What is qualitative interviewing?  
36 [http://eprints.ncrm.ac.uk/3276/1/complete\\_proofs.pdf](http://eprints.ncrm.ac.uk/3276/1/complete_proofs.pdf) (accessed May 2019)  
37  
38 25 Richie J, Lewis J, Elam G et al. Designing and selecting samples. In: Ritchie J, Lewis J, McNaughton  
39 Nicholls C, Ormston R, eds. Qualitative Research Practice. A Guide for Social Science Students and  
40 Researchers. Great Britain: SAGE Publications Ltd 2014:111-45.  
41  
42 26 Elo S, Kyngäs H. The qualitative content analysis process. *J Adv Nurs*2008;62:107-15 doi: 10.1111/j.1365-  
43 2648.2007.04569.x  
44  
45 27 Pope C, Ziebland S, Mays N. Analysing qualitative data *BMJ*2000;320:114-6 doi:  
46 10.1136/bmj.320.7227.114  
47  
48 28 Tong A, Sainsbury P, Craig J. Consolidated criteria for reporting qualitative research (Coreq): a 32-item  
49 checklist for interviews and focus groups. *Int J Qual Health Care*2007;19:349-57. doi:  
50 10.1093/intqhc/mzm042  
51  
52 29 Finnish National Board of Research Integrity. Ethical review in human sciences.  
53 <https://www.tenk.fi/en/ethical-review-in-human-sciences> (accessed Aug 2018)  
54  
55 30 Pouillon L, Danese S, Hart A, et al. Consensus report: clinical recommendations for the prevention and  
56 management of the nocebo effect in biosimilar-treated IBD patients. *Aliment Pharmacol Ther*2019;49:1181-  
57 7. <https://doi.org/10.1111/apt.15223>.  
58  
59  
60



1  
2  
3  
4  
5  
6  
7  
8  
9  
10  
11  
12  
13  
14  
15  
16  
17  
18  
19  
20  
21  
22  
23  
24  
25  
26  
27  
28  
29  
30  
31  
32  
33  
34  
35  
36  
37  
38  
39  
40  
41  
42  
43  
44  
45  
46  
47  
48  
49  
50  
51  
52  
53  
54  
55  
56  
57  
58  
59  
60

- 31 Giuliani R, Taberner J, Cardoso F, et al. Knowledge and use of biosimilars in oncology: a survey by the European Society for Medical Oncology. *ESMO Open*2019;4:e000460. doi:10.1136/esmoopen-2018-000460.
- 32 Leonard E, Wascovich M, Oskouei S, et al. Factors affecting health care provider knowledge and acceptance of biosimilar medicines: a systematic review. *J Manag Care Spec Pharm*2019;25:102-12. doi: 10.18553/jmcp.2019.25.1.102.
- 33 Scherlinger M, Langlois E, Germain V, et al. Acceptance rate and sociological factors involved in the switch from originator to biosimilar etanercept (SB4). *Semin Arthritis Rheum*2019;48:927-32. doi: 10.1016/j.semarthrit.2018.07.005.
- 34 Heikkilä R, Mäntyselkä P, Ahonen R. Why people refuse generic substitution: a population survey of public opinion on generic substitution in Finland. *Drugs Ther Perspect*2012;28:24–6
- 35 Malassigné M, Megne-Wabo M, Rigalleau V, et al. 4CPS-008 Impact of pharmaceutical interview in patient acceptance of insulin glargine's biosimilar 100UI/ml [abstract] *Eur J Hosp Pharm*2019;26:A71.
- 36 Håkonsen H, Eilertsen M, Borge H, et al. Generic substitution: additional challenge for adherence in hypertensive patients? *Curr Med Res Opin*2009;25:2515-21. doi: 10.1185/03007990903192223.
- 37 Bulsara C, McKenzie A, Sanfilippo F, et al. "Not the full Monty": a qualitative study of seniors' perceptions of generic medicines in Western Australia. *Aust J Prim Health*2010;16: 240-5.
- 38 Gill L, Helkkula A, Cobelli N, et al. How do customers and pharmacists experience generic substitution? *Int J Pharm Healthc Mark*2010;4:375-95
- 39 European Medicines Agency and Heads of Medicines Agencies. Guideline on good pharmacovigilance practices (GVP), Module XVI Addendum I – Educational materials. EMA/61341/2015. [https://www.ema.europa.eu/en/documents/regulatory-procedural-guideline/guideline-good-pharmacovigilance-practices-gvp-module-xvi-addendum-i-educational-materials\\_en.pdf](https://www.ema.europa.eu/en/documents/regulatory-procedural-guideline/guideline-good-pharmacovigilance-practices-gvp-module-xvi-addendum-i-educational-materials_en.pdf) (accessed Apr 2019)
- 40 Finnish Medicines Act 396/1987 <https://www.finlex.fi/fi/laki/ajantasa/1987/19870395> (accessed Apr 2019)
- 41 European Medicines Agency. Biosimilar medicines: overview. <https://www.ema.europa.eu/en/human-regulatory/overview/biosimilar-medicines-overview> (accessed May 2019)
- 42 Aladul MI, Fitzpatrick RW, Chapman SR. Healthcare professionals' perceptions and perspectives on biosimilar medicines and the barriers and facilitators to their prescribing in UK: a qualitative study *BMJ Open* 2018;8:e023603. doi: 10.1136/bmjopen-2018-023603
- 43 European Medicines Agency. Good practice guide on risk minimisation and prevention of medication errors [https://www.ema.europa.eu/en/documents/regulatory-procedural-guideline/good-practice-guide-risk-minimisation-prevention-medication-errors\\_en.pdf](https://www.ema.europa.eu/en/documents/regulatory-procedural-guideline/good-practice-guide-risk-minimisation-prevention-medication-errors_en.pdf) (accessed May 2019)
- 44 Beck M, Michel B, Rybarczyk-Vigouret M, et al. Rheumatologists' Perceptions of Biosimilar Medicines Prescription: Findings from a French Web-Based Survey. *BioDrugs*2016;30:585-92 doi: 10.1007/s40259-016-0202-5
- 45 Danese S, Fiorino G, Michetti P. Changes in biosimilar knowledge among European Crohn's Colitis Organization [ECCO] members: An updated survey. *J Crohns Colitis*2016;10:1362-5 doi: 10.1093/ecco-jcc/jjw090
- 46 Dolinar RO, Reilly MS. Biosimilars naming, label transparency and authority of choice -survey findings among European physicians. *GaBI Journal*2014;3:58-62 doi: 10.5639/gabij.2014.0302.018

- 1  
2  
3 47 O'Callaghan J, Bermingham M, Leonard M, et al. Assessing awareness and attitudes of healthcare  
4 professionals on the use of biosimilar medicines: A survey of physicians and pharmacists in Ireland. *Regul*  
5 *Toxicol Pharmacol*2017;88:252-61 doi: 10.1016/j.yrtph.2017.06.013.  
6  
7 48 Gewanter HL, Reilly MS. Prescribing practices for biosimilars: questionnaire survey findings from  
8 physicians in Argentina, Brazil, Colombia and Mexico. *GaBI Journal*2015;4:161-6 doi:  
9 10.5639/gabij.2015.0404.036  
10  
11 49 Grabowski D, Henderson B, Lam D, et al. Attitudes towards subsequent entry biologics/biosimilars: A  
12 survey of Canadian rheumatologists. *Clin Rheumatol*2015;34: 1427-33. doi:10.1007/s10067-014-2835-4.  
13  
14 50 Dolinar RO, Reilly MS. Biosimilars naming, label transparency and authority of choice – survey findings  
15 among European physicians. *GaBI Journal*2014;3:58-62. doi: 10.5639/gabij.2014.0302.018  
16  
17 51 Murby SP, Reilly MS. A survey of Australian prescribers' views on the naming and substitution of  
18 biologicals. *GaBI Journal*2017;6:107-13 doi: 10.5639/gabij.2017.0603.022  
19  
20 52 Sarnola K, Merikoski M, Jyrkkä J, et al. Uptake of biosimilars in Finland – Physicians' views. Finnish  
21 Medicines Agency Fimea. *Serial Publication Fimea Develops, Assesses and Informs* 4/2019, 2019.  
22 <http://urn.fi/URN:ISBN:978-952-7299-02-9> (accessed May 2019)  
23  
24 53 Chapman SR, Fitzpatrick RW, Aladul MI. Knowledge, attitude and practice of healthcare professionals  
25 towards infliximab and insulin glargine biosimilars: result of a UK web-based survey. *BMJ*  
26 *Open*2017;7(6):e016730. doi: 10.1136/bmjopen-2017-016730.  
27  
28 54 Olsson E, Wallach-Kildemoes H, Ahmed B, et al. The influence of generic substitution on the content of  
29 patient-pharmacist communication in Swedish community pharmacies. *Int J Pharm Pract*2017;25:274-81.  
30 doi: 10.1111/ijpp.12299  
31  
32 55 Shrank WH, Liberman JN, Fischer MA, et al. The consequences of requesting "dispense as written". *Am J*  
33 *Med*2011;124:309-17. doi: 10.1016/j.amjmed.2010.11.020.  
34  
35 56 Egeth M, Soosaar J, Nash P, et al. Patient and Healthcare Professionals Preference for Brenzys vs. Enbrel  
36 Autoinjector for Rheumatoid Arthritis: A Randomized Crossover Simulated-Use Study. *Adv*  
37 *Ther*2017;34:1157-72. doi:10.1007/s12325-017-0523-x  
38  
39 57 Tischer B, Mehl A. Patients' and nurses' preferences for autoinjectors for rheumatoid arthritis: results of  
40 a European survey. *Patient Prefer Adherence*2018; 212:1413-24. doi: 10.2147/PPA.S169339.  
41  
42 58 Fenwick S, Thakur K, Munro D. Nurse and patient perceptions and preferences for subcutaneous  
43 autoinjectors for inflammatory joint or bowel disease: Findings from a European survey. *Rheumatol Ther*  
44 2019;6:195-206. doi: 10.1007/s40744-019-0144-8  
45  
46 59 Mellstedt H. Clinical considerations for biosimilar antibodies. *EJC suppl*2013;11(3):1–11 doi:  
47 10.1016/S1359-6349(13)70001-6.  
48  
49 60 Vermeer NS, Giezen TJ, Zastavnik S, et al. Identifiability of biologicals in adverse drug reaction reports  
50 received from European clinical practice. *Clin Pharmacol Ther*2019;105(4):962-9 doi:10.1002/cpt.1310.  
51  
52 61 Finnish Medicines Agency. Lääkkeiden toimittaminen. [in Finnish] Dnro Fimea 003223/00.01.02/2016.  
53 [https://www.fimea.fi/documents/160140/764653/M%c3%a4%c3%a4r%c3%a4ys.pdf/9332fa84-d115-41e2-](https://www.fimea.fi/documents/160140/764653/M%c3%a4%c3%a4r%c3%a4ys.pdf/9332fa84-d115-41e2-b357-19eb28191312)  
54 [b357-19eb28191312](https://www.fimea.fi/documents/160140/764653/M%c3%a4%c3%a4r%c3%a4ys.pdf/9332fa84-d115-41e2-b357-19eb28191312) (accessed May 2019)  
55  
56 62 Kanta Services, The Social Insurance Institution of Finland. Prescribing a medicine.  
57 <https://www.kanta.fi/en/professionals/prescribing-a-medicine> (accessed May 2019)  
58  
59 63 EudraLex. Directive 2011/62/EU of the European Parliament and of the Council of 8 June 2011 amending  
60 Directive 2001/83/EC on the Community code relating to medicinal products for human use, as regards the

1  
2  
3 prevention of the entry into the legal supply chain of falsified medicinal products. In: Union OJ L, ed.  
4 Brussels: Official Journal of the European Union, 2011.

5  
6 64 EudraLex. Directive 2001/83/EC of the European Parliament and of the Council of 6 November 2001 on  
7 the Community code relating to medicinal products for human use (Consolidated version: 16/11/2012).  
8 [https://ec.europa.eu/health/documents/eudralex/vol-1\\_en](https://ec.europa.eu/health/documents/eudralex/vol-1_en) (Accessed May 2019).

9  
10 65 Finnish Medicines Agency. Substitutable medicinal products. Criteria used in compiling the list.  
11 [https://www.fimea.fi/web/en/databases\\_and\\_registeries/substitutable\\_medicinal\\_products/criteria\\_used](https://www.fimea.fi/web/en/databases_and_registeries/substitutable_medicinal_products/criteria_used_in_compiling_the_list)  
12 [\\_in\\_compiling\\_the\\_list](https://www.fimea.fi/web/en/databases_and_registeries/substitutable_medicinal_products/criteria_used_in_compiling_the_list) (Accessed May 2019).

13  
14 66 U.S. Department of Health and Human Services, Food and Drug Administration. Center for Drug  
15 Evaluation and Research (CDER), Center for Biologics Evaluation and Research (CBER). Considerations in  
16 Demonstrating Interchangeability with a Reference Product Guidance for Industry.  
17 [https://www.fda.gov/regulatory-information/search-fda-guidance-documents/considerations-](https://www.fda.gov/regulatory-information/search-fda-guidance-documents/considerations-demonstrating-interchangeability-reference-product-guidance-industry)  
18 [demonstrating-interchangeability-reference-product-guidance-industry](https://www.fda.gov/regulatory-information/search-fda-guidance-documents/considerations-demonstrating-interchangeability-reference-product-guidance-industry) (accessed May 2019)

19  
20 67 O'Callaghan J, Barry SP, Bermingham M, et al. Regulation of biosimilar medicines and current  
21 perspectives on interchangeability and policy. *Eur J Clin Pharmacol*2019;75:1-11. doi: 10.1007/s00228-018-  
22 2542-1

23  
24 68 Larkin H, Macdonald J, Lumsden R: Pharmacy-mediated substitution of biosimilars – a global survey  
25 benchmarking country substitution policies. *GaBi J*2017;6:157-64. doi: 10.5639/gabij.2017.0604.034

26  
27 69 Greene L, Singh RM, Carden MJ et al. Strategies for overcoming barriers to adopting biosimilars and  
28 achieving goals of the Biologics Price Competition and Innovation Act: A survey of managed care and  
29 specialty pharmacy professionals. *J Manag Care Spec Pharm*2019;22:1-9 doi: 0.18553/jmcp.2019.18412

30  
31 70 Moorkens E, Vulto AG, Huys I, et al. Policies for biosimilar uptake in Europe: An overview. *PLoS*  
32 *One*2017;12:e0190147. doi:10.1371/journal.pone.0190147

33  
34 71 Rosenthal M. Qualitative research methods: Why, when, and how to conduct interviews and focus  
35 groups in pharmacy research. *Currents in Pharmacy Teaching and Learning*2016;8:509–16

## 36 37 38 39 REFERENCES IN FIGURES OR TABLES

40  
41 T3 The Social Insurance Institution of Finland. Generic substitution and the reference price system.  
42 <https://www.kela.fi/web/en/medicine-expenses-generic-substitution-and-the-reference-price-system>  
43 (accessed Jun 2019)

## 44 45 46 47 48 LEGENDS OF THE FIGURES

49  
50  
51  
52 **Figure 1** Existing interactions (black lines) between patients and healthcare professionals in biological  
53 medicine treatment and new tasks (red boxes) and new interactions (red dashed lines) between patients  
54 and healthcare professionals induced by automated substitution of biologics identified in the stakeholders'  
55 interviews (n=32).  
56  
57  
58  
59  
60

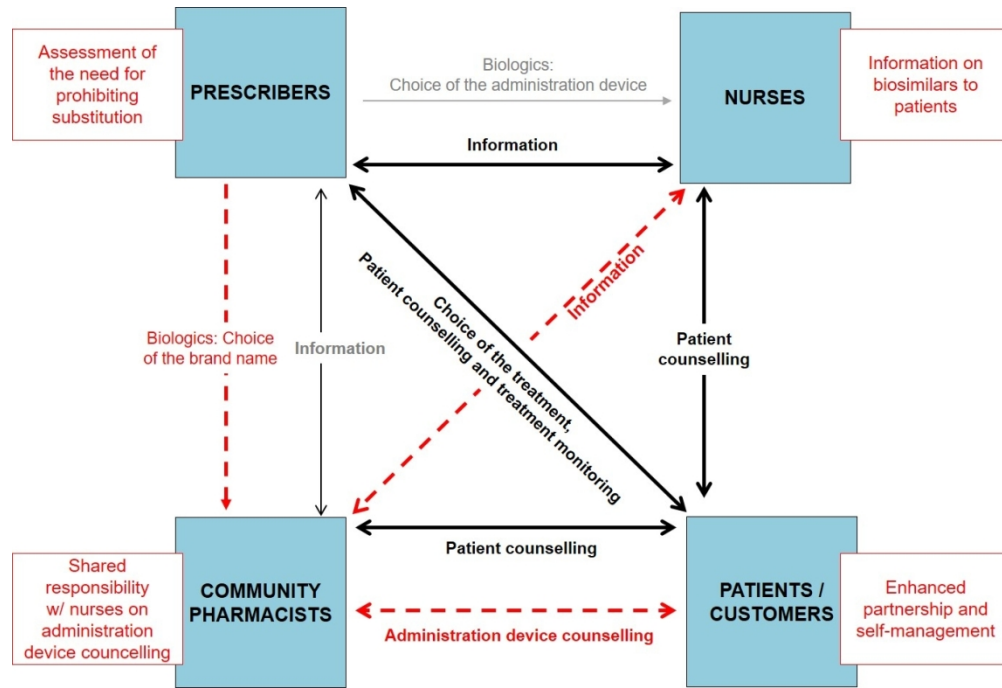

Existing interactions (black lines) between patients and healthcare professionals in biological medicine treatment and new tasks (red boxes) and new interactions (red dashed lines) between patients and healthcare professionals induced by automated substitution of biologics identified in the stakeholders' interviews (n=32).

234x159mm (150 x 150 DPI)

1  
2  
3 Supplement Material 1  
4  
5

6 Interview Guide and Example Questions  
7  
8  
9

10 **Theme 1 Background and attitudes towards substitution**

- 11 - Would you briefly describe how you are dealing with the generic substitution that is currently  
12 taking place in the community pharmacies?  
13 - How well do you know the biological originator medicines and the biosimilars and how have you  
14 been dealing with them?  
15 - What do you think about the possibility of biologics' substitution in the community pharmacies?  
16 - Is the current generic substitution model also suitable for the implementation of the biologics'  
17 substitution?  
18  
19  
20

21 **Theme 2 Medication safety of biologics' substitution**

- 22 - What should be taken into account in order to ensure the medication safety if the substitution of  
23 biologics is introduced in the community pharmacies?  
24 - How often could you expect the substitution would take place to an individual patient?  
25 - Should the number of switches or timing of switches be limited in some manner?  
26 - Considering substitution, there any differences between different indications or drugs?  
27  
28  
29

30 **Theme 3 Prerequisites for substitution** (These questions are related to the community pharmacy activity.  
31 In the theme 3, issues were different for each perspective)  
32

- 33 - Under what conditions do you consider that biologics substitution in community pharmacy could  
34 work?  
35 - What kind of skills or training would be needed for community pharmacists?  
36 - What should be considered for the implementation of drug counseling?  
37 - What would be the effects of biologics' substitution at a pharmacy level on treatment adherence,  
38 management of pharmacotherapy and monitoring of treatment?  
39 - How to secure the batch number and traceability of the biological medicinal product?  
40 - What should be considered from the drug storage point of view?  
41  
42  
43

44 **Theme 4 Implementation and monitoring of potential biologics substitution**

- 45 - If substitution takes place in time, how would you like to see a change in practice?  
46 - How should your organization / workplace / interest group and other stakeholders be involved in  
47 preparation for deployment?  
48 - How the implementation of the substitution should be monitored?  
49 - Is there something that has not been dealt with now, but which should be taken into account with  
50 substitution of biologics?  
51  
52  
53  
54  
55  
56  
57  
58  
59  
60

Supplement Material 2

An illustration of the key actors in medicine distribution and patient care that were covered in the stakeholder interviews (n=32) concerning automated substitution of biologics in Finland.

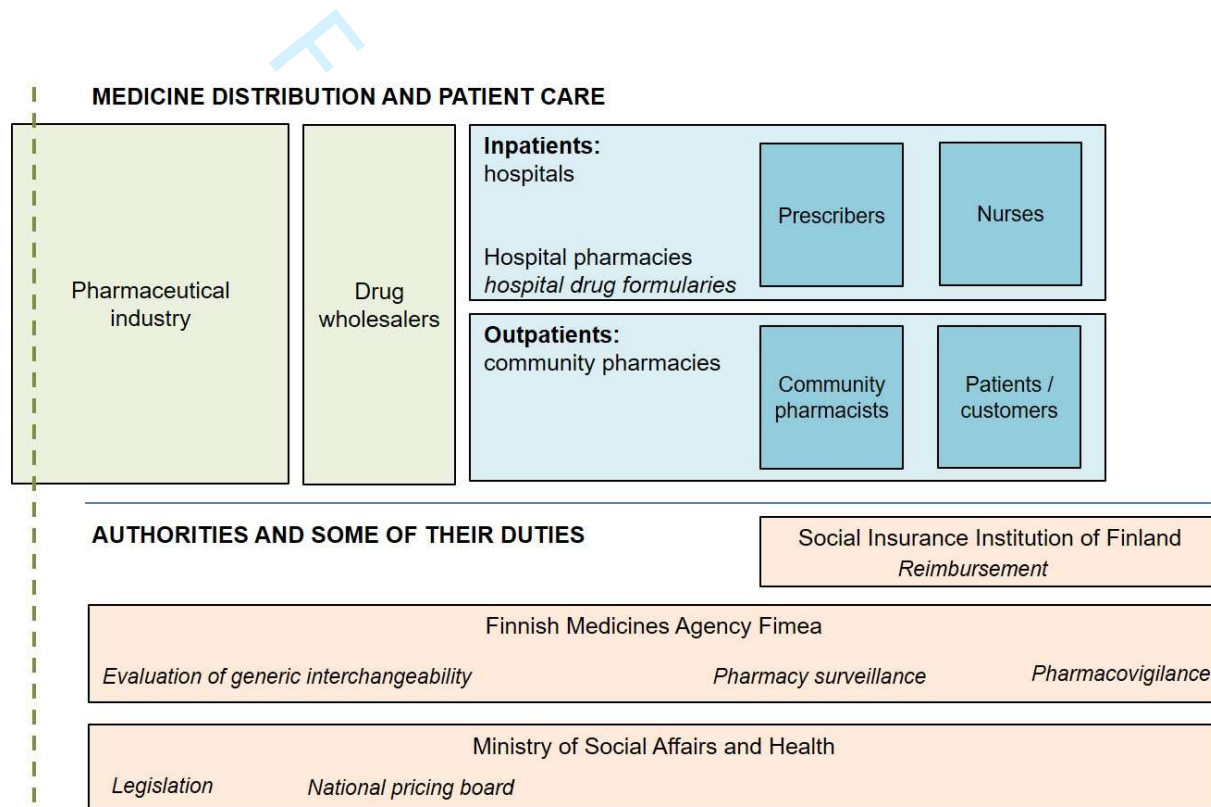

• Marketing authorization is a prerequisite for national procedure.



## Consolidated criteria for reporting qualitative studies (COREQ): 32-item checklist

| No                                             | Item                                     | Guide questions/description                                                                                                                                     | Page(s) /line no(s) |
|------------------------------------------------|------------------------------------------|-----------------------------------------------------------------------------------------------------------------------------------------------------------------|---------------------|
| <b>Domain 1: Research team and reflexivity</b> |                                          |                                                                                                                                                                 |                     |
| Personal Characteristics                       |                                          |                                                                                                                                                                 |                     |
| 1.                                             | Interviewer/facilitator                  | Which author/s conducted the interview or focus group?                                                                                                          | 6/3-4               |
| 2.                                             | Credentials                              | What were the researcher's credentials? <i>E.g. PhD, MD</i>                                                                                                     | 6/13-14             |
| 3.                                             | Occupation                               | What was their occupation at the time of the study?                                                                                                             | 6/13-14             |
| 4.                                             | Gender                                   | Was the researcher male or female?                                                                                                                              | 6/13-14             |
| 5.                                             | Experience and training                  | What experience or training did the researcher have?                                                                                                            | 6/13-14             |
| Relationship with participants                 |                                          |                                                                                                                                                                 |                     |
| 6.                                             | Relationship established                 | Was a relationship established prior to study commencement?                                                                                                     | N/A                 |
| 7.                                             | Participant knowledge of the interviewer | What did the participants know about the researcher? <i>e.g. personal goals, reasons for doing the research</i>                                                 | N/A                 |
| 8.                                             | Interviewer characteristics              | What characteristics were reported about the interviewer/facilitator? <i>e.g. Bias, assumptions, reasons and interests in the research topic</i>                | N/A                 |
| <b>Domain 2: study design</b>                  |                                          |                                                                                                                                                                 |                     |
| Theoretical framework                          |                                          |                                                                                                                                                                 |                     |
| 9.                                             | Methodological orientation and Theory    | What methodological orientation was stated to underpin the study? <i>e.g. grounded theory, discourse analysis, ethnography, phenomenology, content analysis</i> | 6/33-34             |
| Participant selection                          |                                          |                                                                                                                                                                 |                     |
| 10.                                            | Sampling                                 | How were participants selected? <i>e.g. purposive, convenience, consecutive, snowball</i>                                                                       | 5/42-52             |
| 11.                                            | Method of approach                       | How were participants approached? <i>e.g. face-to-face, telephone, mail, email</i>                                                                              | 5/54-60, 6/1-6      |
| 12.                                            | Sample size                              | How many participants were in the study?                                                                                                                        | 7/7-8               |
| 13.                                            | Non-participation                        | How many people refused to participate or dropped out? Reasons?                                                                                                 | 7/15-23             |
| Setting                                        |                                          |                                                                                                                                                                 |                     |

| No                                     | Item                           | Guide questions/description                                                                                                              | Page(s) /line no(s)            |
|----------------------------------------|--------------------------------|------------------------------------------------------------------------------------------------------------------------------------------|--------------------------------|
| 14.                                    | Setting of data collection     | Where was the data collected? e.g. <i>home, clinic, workplace</i>                                                                        | 6/15-17                        |
| 15.                                    | Presence of non-participants   | Was anyone else present besides the participants and researchers?                                                                        | 6/15-17                        |
| 16.                                    | Description of sample          | What are the important characteristics of the sample? e.g. <i>demographic data, date</i>                                                 | 7/7-9, Table 1                 |
| <b>Data collection</b>                 |                                |                                                                                                                                          |                                |
| 17.                                    | Interview guide                | Were questions, prompts, guides provided by the authors? Was it pilot tested?                                                            | 5/32-38, Supplement material 1 |
| 18.                                    | Repeat interviews              | Were repeat interviews carried out? If yes, how many?                                                                                    | N/A                            |
| 19.                                    | Audio/visual recording         | Did the research use audio or visual recording to collect the data?                                                                      | 6/11-12                        |
| 20.                                    | Field notes                    | Were field notes made during and/or after the interview or focus group?                                                                  | N/A                            |
| 21.                                    | Duration                       | What was the duration of the interviews or focus group?                                                                                  | 7/9-11                         |
| 22.                                    | Data saturation                | Was data saturation discussed?                                                                                                           | N/A                            |
| 23.                                    | Transcripts returned           | Were transcripts returned to participants for comment and/or correction?                                                                 | N/A                            |
| <b>Domain 3: analysis and findings</b> |                                |                                                                                                                                          |                                |
| <b>Data analysis</b>                   |                                |                                                                                                                                          |                                |
| 24.                                    | Number of data coders          | How many data coders coded the data?                                                                                                     | 6/42-44                        |
| 25.                                    | Description of the coding tree | Did authors provide a description of the coding tree?                                                                                    | 6/37-41, Tables 2 and 3        |
| 26.                                    | Derivation of themes           | Were themes identified in advance or derived from the data?                                                                              | 6/37-41                        |
| 27.                                    | Software                       | What software, if applicable, was used to manage the data?                                                                               | N/A                            |
| 28.                                    | Participant checking           | Did participants provide feedback on the findings?                                                                                       | N/A                            |
| <b>Reporting</b>                       |                                |                                                                                                                                          |                                |
| 29.                                    | Quotations presented           | Were participant quotations presented to illustrate the themes / findings? Was each quotation identified? e.g. <i>participant number</i> | Table 2                        |
| 30.                                    | Data and findings consistent   | Was there consistency between the data presented and the findings?                                                                       | 7-19                           |



| No  | Item                    | Guide questions/description                                            | Page(s) /line no(s) |
|-----|-------------------------|------------------------------------------------------------------------|---------------------|
| 31. | Clarity of major themes | Were major themes clearly presented in the findings?                   | 7-19                |
| 32. | Clarity of minor themes | Is there a description of diverse cases or discussion of minor themes? | 7-19                |

Reference: Tong A, Sainsbury P, Craig J. Consolidated criteria for reporting qualitative research (COREQ): a 32-item checklist for interviews and focus groups. *Int J Qual Health Care.* 2007;19(6):349-357.

For peer review only

# BMJ Open

## MEDICATION SAFETY RISKS TO BE MANAGED IN NATIONAL IMPLEMENTATION OF AUTOMATIC SUBSTITUTION OF BIOLOGICAL MEDICINES – A QUALITATIVE STUDY

|                                 |                                                                                                                                                                                                                                                                                                                                                                                                                                                                                                                                                                                                                                                                                 |
|---------------------------------|---------------------------------------------------------------------------------------------------------------------------------------------------------------------------------------------------------------------------------------------------------------------------------------------------------------------------------------------------------------------------------------------------------------------------------------------------------------------------------------------------------------------------------------------------------------------------------------------------------------------------------------------------------------------------------|
| Journal:                        | <i>BMJ Open</i>                                                                                                                                                                                                                                                                                                                                                                                                                                                                                                                                                                                                                                                                 |
| Manuscript ID                   | bmjopen-2019-032892.R1                                                                                                                                                                                                                                                                                                                                                                                                                                                                                                                                                                                                                                                          |
| Article Type:                   | Original research                                                                                                                                                                                                                                                                                                                                                                                                                                                                                                                                                                                                                                                               |
| Date Submitted by the Author:   | 06-Sep-2019                                                                                                                                                                                                                                                                                                                                                                                                                                                                                                                                                                                                                                                                     |
| Complete List of Authors:       | Tolonen, Hanna; Helsingin Yliopisto, Clinical Pharmacy Group, Division of Pharmacology and Pharmacotherapy, Faculty of Pharmacy; Helsingin yliopistollinen Keskussairaala, HUS Pharmacy<br>Airaksinen, Marja; Helsingin Yliopisto, Clinical Pharmacy Group, Division of Pharmacology and Pharmacotherapy, Faculty of Pharmacy<br>Ruokoniemi, Päivi; Finnish Medicines Agency Fimea<br>Hämeen-Anttila, Katri; Finnish Medicines Agency Fimea<br>Shermock, Kenneth; Johns Hopkins Hospital, Center for Medication Quality and Outcomes; Johns Hopkins University Bloomberg School of Public Health, Center for Drug Safety and Effectiveness<br>Kurki, Pekka; Helsingin Yliopisto |
| <b>Primary Subject Heading</b>: | Qualitative research                                                                                                                                                                                                                                                                                                                                                                                                                                                                                                                                                                                                                                                            |
| Secondary Subject Heading:      | Health policy                                                                                                                                                                                                                                                                                                                                                                                                                                                                                                                                                                                                                                                                   |
| Keywords:                       | Biosimilars, biological medicines, medication safety, automatic substitution, interchangeability                                                                                                                                                                                                                                                                                                                                                                                                                                                                                                                                                                                |
|                                 |                                                                                                                                                                                                                                                                                                                                                                                                                                                                                                                                                                                                                                                                                 |

SCHOLARONE™  
Manuscripts

**MEDICATION SAFETY RISKS TO BE MANAGED IN NATIONAL IMPLEMENTATION OF AUTOMATIC  
SUBSTITUTION OF BIOLOGICAL MEDICINES – A QUALITATIVE STUDY**

|                                                 |                                                                                                                                                                                                                                                                                                                                          |
|-------------------------------------------------|------------------------------------------------------------------------------------------------------------------------------------------------------------------------------------------------------------------------------------------------------------------------------------------------------------------------------------------|
| <i>Authors</i>                                  | Hanna M. Tolonen, Marja Airaksinen, Päivi Ruokoniemi, Katri Hämeen-Anttila, Kenneth M. Shermock, Pekka Kurki                                                                                                                                                                                                                             |
| <i>Position and affiliation for each author</i> | Hanna M. Tolonen, MSc (Pharm), PhD student <ul style="list-style-type: none"> <li>- HUS Pharmacy, Hospital Pharmacy of Helsinki University Hospital (HUS), Helsinki, Finland</li> <li>- Clinical Pharmacy Group, Division of Pharmacology and Pharmacotherapy, Faculty of Pharmacy, University of Helsinki, Helsinki, Finland</li> </ul> |
|                                                 | Marja Airaksinen, PhD, Professor <ul style="list-style-type: none"> <li>- Clinical Pharmacy Group, Division of Pharmacology and Pharmacotherapy, Faculty of Pharmacy, University of Helsinki, Helsinki, Finland</li> </ul>                                                                                                               |
|                                                 | Päivi Ruokoniemi, MD, PhD, Senior Medical Officer <ul style="list-style-type: none"> <li>- Finnish Medicines Agency Fimea, Helsinki, Finland</li> </ul>                                                                                                                                                                                  |
|                                                 | Katri Hämeen-Anttila, PhD, Head of Research and Development <ul style="list-style-type: none"> <li>- Finnish Medicines Agency Fimea, Kuopio, Finland</li> </ul>                                                                                                                                                                          |
|                                                 | Kenneth M. Shermock, PharmD, PhD, FASHP <ul style="list-style-type: none"> <li>- Center for Medication Quality and Outcomes, The Johns Hopkins Health System, Baltimore, MD, US</li> <li>- Center for Drug Safety and Effectiveness, The Johns Hopkins Bloomberg School of Public Health, Baltimore, MD, US</li> </ul>                   |
|                                                 | Pekka Kurki, MD, Adjunct professor <ul style="list-style-type: none"> <li>- University of Helsinki, Helsinki, Finland</li> </ul>                                                                                                                                                                                                         |
| <i>Corresponding author</i>                     | Hanna M. Tolonen <ul style="list-style-type: none"> <li>- Stenbäckinkatu 9, FI-00029 HUS, Finland.</li> <li>- E-mail: hanna.tolonen@hus.fi</li> <li>- Telephone: +358 505705371</li> <li>- OrcidID: <a href="https://orcid.org/0000-0002-6824-7566">https://orcid.org/0000-0002-6824-7566</a></li> </ul>                                 |

Word count: 4055

## ABSTRACT

### Objectives

To explore relevant Finnish stakeholders' perceptions on the automatic substitution of biological medicines with particular focus on medication safety and issues that need to be considered to create an appropriate model for automatic biologic product substitution.

### Design

Qualitative interview study

### Methods

Data were collected in semi-structured individual (n=17), pair (n=7) and group (n=8) interviews (32 interviews, 62 participants) in 2018. Participants represented a wide range of stakeholders involved in the pharmacotherapy process: community pharmacists (n=8 interviews), authorities (n=7), prescribers (n=7), pharmaceutical industry and wholesalers (n=6), patients / customers (n=2), hospital pharmacists (n=1) and nurses (n=1). Inductive content analysis was performed.

### Results

Benefits of automatic substitution were identified as cost savings, more patients receiving biological treatments and enhanced continuity of treatment. Six major risk categories were identified: 1) the patient's medication is interrupted or complicated temporarily or permanently, 2) the patient uses two products with the same active substance, 3) the traceability of the product is compromised, 4) the patient cannot get into healthcare in case of problems, 5) the patient does not receive substitution-related advice from a pharmacy, and 6) the patient is distracted by the support material he receives. Several risk mitigation measures were commonly mentioned: medication and device counselling by pharmacists (n=23), infrequent substitution interval (n=15), and better knowledge on biosimilars among healthcare providers (n=13).

### Conclusions

Automatic substitution of biologics is associated with risks that should be prospectively managed before implementing the procedure. The substitution also introduces new tasks and communication needs to those involved in actual medication use process, particularly to community pharmacists who will be responsible for substitution and counselling the patients.

### Keywords

Biosimilars, biological medicines, medication safety, automatic substitution, interchangeability

1  
2  
3  
4  
5  
6  
7  
8  
9  
10  
11  
12  
13  
14  
15  
16  
17  
18  
19  
20  
21  
22  
23  
24  
25  
26  
27  
28  
29  
30  
31  
32  
33  
34  
35  
36  
37  
38  
39  
40  
41  
42  
43  
44  
45  
46  
47  
48  
49  
50  
51  
52  
53  
54  
55  
56  
57  
58  
59  
60

### STRENGTHS AND LIMITATIONS OF THIS STUDY

- This is the first study to explore potential medication safety risks while implementing automatic substitution of biologics.
- Interviews are an effective method to gain an in-depth understanding of important issues when considering a model for automatic substitution of biologics.
- A wide range of stakeholders participated in the interviews offering their viewpoints.
- This study explored varying stakeholder views on automatic substitution of biologics rather than compared differences between the stakeholder groups.
- The limited number of patients and nurses in the interviews may have influenced the results.

## INTRODUCTION

Biological medicines (“biologics”), especially therapeutic proteins, are used to treat an increasing number of patients over a wide range of therapeutic indications.<sup>1</sup> The high costs of original biological medicines represent a major burden on health care budgets.<sup>2</sup> The biosimilar concept with abbreviated approval pathway was developed in the EU to increase competition within biologics’ market.<sup>3</sup> Subsequently, biosimilars have triggered price competition and price reductions in several countries.<sup>4</sup> In Finland, hospitals have generally adopted biosimilars into their formularies mainly through their tendering processes.<sup>4-5</sup> However, in ambulatory care, the uptake of biosimilars has been poor.<sup>6</sup> In ambulatory care, the decision to switch between biologics is made by the prescriber and the incentives to switch from a biologic reference product to a biosimilar are weak: the social insurance reimbursement system covers the majority of expenses for the patient either way.<sup>5</sup>

The introduction of automatic generic substitution was an effective way to restrict the increase of medication expenditures when uptake of generic prescribing lagged.<sup>7-10</sup> From a regulatory perspective, the approaches to demonstrate equivalence of generic small molecule drugs and biosimilars are analogous; however, the requirements to demonstrate the similarity are more extensive for biosimilars.<sup>11</sup> This is due to the heterogeneity of the molecules produced by biotechnological processes.<sup>12</sup> Theoretical considerations and clinical switching studies suggest that biosimilars developed according to the EU guidance are interchangeable with their reference products.<sup>13-20</sup> Furthermore, no consistent safety signals from pharmacovigilance reporting systems that monitor switching between highly similar biologics have been identified.<sup>12, 21</sup>

Several prominent EU regulatory agencies, including Finnish Medicines Agency, and medical societies have issued position papers supporting the interchangeability of biosimilars with their reference products under the supervision of the prescriber.<sup>22</sup> However, since the marketing authorization process ensures that the biosimilar has the same efficacy and safety profile as the reference product, relevant changes in treatment are not expected upon switching.<sup>13</sup> Thus, in countries where biosimilars have been regarded as interchangeable, the (automatic) substitution is no longer a scientific question, but a political, practical and organizational issue. The aim of this study was to explore relevant Finnish stakeholders’ perceptions on the automatic substitution of biological medicines with the focus on medication safety. In the spirit of prospective risk management, our focus was to identify issues that should be considered to create an appropriate model for automatic biological medicine substitution.

## METHODS

Finnish stakeholders' perceptions on automatic substitution of biologics were explored by semi-structured theme interviews. This method is particularly suitable for situations where it is desirable to elicit a wide range of views on a specific topic.<sup>23</sup> The theme interview is also well suited for previously unstudied topics.<sup>24</sup>

### Interview guide and additional interview material

The flexible interview guide with four themes was developed (Supplement Material 1). The flexibility in the guide allowed a conversational and interactive approach in the interviews.<sup>23</sup> The themes were: 1) attitudes towards automatic substitution, 2) medication safety upon substitution, 3) prerequisites for implementation and specific issues pertaining to different perspectives, and 4) implementation and monitoring. The interview guide was constructed based on the study aim, and the research group's experience and knowledge that covered, for example, biosimilar policy making on the EU level, implementing the generic substitution at the national level as well as extensive medication safety research. In the interviews, a table of biosimilars that were on the market in Finland in August 2018, and a table of biosimilars authorized in the EU, but not launched in Finland were made available.

The interview guide was tested in a pilot interview. Based on the pilot, the explanations of the key terms used in the interview were added to the interview material. After this, the guide was adapted but kept open to further adjustments during the data collection, particularly regarding different stakeholder roles. The pilot interview was included in the research data.

### Sampling and recruitment of the interviewees

The study sample covered a full range of national stakeholders associated with biological medication starting from the marketing authorization to medicine distribution and patient care (Supplement Material 2). The research group identified the stakeholders that were invited to participate. Purposive sampling was used to select the stakeholders to ensure the coverage of all relevant perspectives.<sup>25</sup> The following operators were included: community and hospital pharmacists, prescribers, nurses, patients/customers, pharmaceutical industry, pharmaceutical wholesalers, and different authorities regarding distribution and pharmacotherapy process.

Interviewees were primary recruited through interest groups, professional associations, and patient organizations. The aim of the interviews was to obtain rich and comprehensive insights from interviewees. The chosen organizations were contacted by email. The date and time for the interview were agreed by

1  
2  
3 email or telephone. The invited organizations independently nominated the person or persons to  
4 participate the interview. This influenced in whether the interview was conducted as an individual, pair or  
5 group interview. Direct recruits were made in situations where it was appropriate (e.g., authorities). A total  
6 of 38 interview invitations were sent.  
7  
8  
9

### 10 11 12 13 **Data collection**

14  
15 Written informed consent was obtained from all interviewees. The interviews were audio recorded. The  
16 interviews were conducted by HMT (female pharmacist, M.Sc., with training in qualitative interviews) in  
17 Finnish at places that were easily reached by the interviewees and were sufficiently private to facilitate a  
18 free and confidential exchange of information.  
19  
20  
21

22  
23 At the beginning of each interview, the interviewer went through the most important terms (biosimilar,  
24 substitution and medication safety) used in the interview to ensure that the concept would not cause any  
25 misunderstandings. Interviewees were encouraged to share their personal views and the possible positions  
26 of their background organization on the topic.  
27  
28  
29

### 30 31 32 **Data analysis**

33  
34 Audio records were transcribed verbatim by a professional transcriber and transcripts were checked for  
35 accuracy by one researcher (HMT). The identities of the participants were anonymized prior to data  
36 analysis. Inductive content analysis, which is applicable for research topics which are not well-known and  
37 are expected to yield new insights, was used.<sup>26-27</sup> Data from individual, pair, and group interviews were  
38 analyzed in the same way, using the interview as the level of the analysis rather than analyzing views of  
39 each individual participants. The data were read through several times and sentences relevant to research  
40 question were coded. Codes that had the same or similar meaning were combined. Combined codes were  
41 grouped into subcategories and further categories that formed, for example, perceived risk descriptions  
42 that were presented in a conceptual model. Suitability of the interchangeability for the biologics, as it is  
43 recognized in Finland, was not in the focus. The data were mainly analyzed by one researcher (HMT). There  
44 were several sessions with the research group where data, analysis and preliminary results were discussed  
45 to improve the trustworthiness of the qualitative analysis. The most representative quotations were  
46 reported. A checklist of the consolidated criteria for reporting qualitative studies was utilized when  
47 applicable.<sup>28</sup>  
48  
49  
50  
51  
52  
53  
54  
55  
56  
57  
58  
59  
60



### Ethical approval

The interviews were conducted in accordance with the Finnish National Board of Research Integrity guidelines for the ethical principles to conduct a research.<sup>29</sup> Ethical pre-evaluation was not required, as all interviewees were asked for informed consent, only adults participated in the interviews and the interviews did not cover the interviewees' personal health information.

### Patient and public involvement

The patients participated in the study as representatives of their patient organizations. There were no patient or public involvement in the planning phase or design of the study. The study participants, including patient representatives, will be personally informed of the main results of the study.

## RESULTS

### Study participants

A total of 32 interviews with 62 participants were performed between August and November 2018 (Table 1). There were 17 individual interviews. The rest were either pair (n=7) or group (n=8) interviews. Each pair and group interview included participants only from one stakeholder group. The mean duration of the interviews was 55 minutes (range from 30 to 98 minutes). All interviews were conducted face-to-face. In three interviews there were additional participants (n=4) also via Skype or over telephone.

Most of the contacted organizations and individuals agreed to participate in the study (n=32, 84%). Six contacts did not lead to an interview. Three invited stakeholders refused to participate due to lack of knowledge or experience on the topic and two participants dropped out since a suitable interview time was not found (group interviews). No response was received for one invitation. A summary of the characteristics of the participants is given in Table 1.

**Table 1** Number of interviews (n=32) and background of the interviewees (n=62).

| BACKGROUND OF THE INTERVIEWEES                                                                                                                                                   | NUMBER OF INTERVIEWS<br>(NUMBER OF INTERVIEWEES) |
|----------------------------------------------------------------------------------------------------------------------------------------------------------------------------------|--------------------------------------------------|
| <b>COMMUNITY PHARMACISTS</b>                                                                                                                                                     | <b>8 (15)</b>                                    |
| <ul style="list-style-type: none"> <li>• National and/or local professional associations</li> <li>• Practitioners (pharmacy owners, pharmacists; M.Sc and B.Sc)</li> </ul>       |                                                  |
| <b>AUTHORITIES</b>                                                                                                                                                               | <b>7 (18)</b>                                    |
| <ul style="list-style-type: none"> <li>• Legislation</li> <li>• Evaluation of interchangeability of generics</li> <li>• Pricing</li> <li>• Surveillance of pharmacies</li> </ul> |                                                  |

|                                                                                                                                         |                |
|-----------------------------------------------------------------------------------------------------------------------------------------|----------------|
| <ul style="list-style-type: none"> <li>• Reimbursement</li> <li>• Pharmacovigilance</li> </ul>                                          |                |
| <b>PRESCRIBERS</b>                                                                                                                      | <b>7 (7)</b>   |
| <ul style="list-style-type: none"> <li>• Professional associations</li> <li>• Practitioners from medical specialty societies</li> </ul> |                |
| <b>PHARMACEUTICAL INDUSTRY AND WHOLESALERS</b>                                                                                          | <b>6 (8)</b>   |
| <ul style="list-style-type: none"> <li>• National interest groups</li> <li>• Pharmaceutical companies and wholesalers</li> </ul>        |                |
| <b>PATIENTS / CUSTOMERS</b>                                                                                                             | <b>2 (5)</b>   |
| <ul style="list-style-type: none"> <li>• Patient associations</li> </ul>                                                                |                |
| <b>HOSPITAL PHARMACISTS</b>                                                                                                             | <b>1 (6)</b>   |
| <ul style="list-style-type: none"> <li>• Hospital drug formulary management</li> </ul>                                                  |                |
| <b>NURSES</b>                                                                                                                           | <b>1 (3)</b>   |
| <ul style="list-style-type: none"> <li>• Specialist nurse associations</li> </ul>                                                       |                |
| <b>TOTAL</b>                                                                                                                            | <b>32 (62)</b> |

### General perceptions of biological medicines' substitution

Practically all participants in the interviews (n=32) preferred physician-led switching as a primary method for enhancing the use of biosimilars, whereas varied attitudes regarding automatic substitution of biologics in community pharmacies were elicited. In half of the interviews (n=16), the position of the attendees was positive to the substitution at the pharmacy level. In 25% of the interviews (n=8), interviewees suggested that there is not enough experience on biosimilars, and they saw risks that should be solved prior to initiating automatic substitution in pharmacies. Automatic substitution of biologics was deemed as a totally inappropriate model in some interviews (n=8). Some negative comments reflected distrust on quality, safety, and efficacy of biosimilars in general. Positive and negative attitudes were both found among all stakeholders, including patient representatives, and all types of interviews (individual, pair or group interviews). Treatment naïve patients were perceived to be the most suitable for substitution.

### Benefits of the automatic substitution of biologics

In addition to cost-savings in health care (n=17), the stakeholders identified several other benefits that might be achieved with implementing biologics' substitution (Table 2). More patients can receive treatments, if savings result to increased number of patients on biological treatment (n=5), initiation of biological treatment in earlier phase (n=3) or introduction of novel treatments for new patients (n=2). Substantial price reductions may also increase patients' willingness and ability to use biologics (n=5), if the price reductions are substantial. Continuity of treatment was also identified as a potential benefit, for example, in the case of medicine shortages (n=4).

**Table 2** Potential benefits of substitution at the pharmacy level as identified in the interviews (n=32)

| Benefit                                     | Description of the benefit                                                                                                                                      | Citation from the interview                                                                                                                                                                                                                    |
|---------------------------------------------|-----------------------------------------------------------------------------------------------------------------------------------------------------------------|------------------------------------------------------------------------------------------------------------------------------------------------------------------------------------------------------------------------------------------------|
| <b>Savings</b>                              | Society saves on drug costs (n=17)                                                                                                                              | “.. that’s where the big money can be saved” PRESCRIBER06                                                                                                                                                                                      |
| <b>More patients can receive treatments</b> | Lower prices can improve patients' willingness and ability to use self-injectable biological products. (n=5)                                                    | “.. patient’s involvement in the treatment may be better if he/she gets a cheaper medicine, it is a bit of problem with expensive biological drugs before reaching annual limit for co-payment..” NURSE01                                      |
|                                             | Patients have better access to biological treatments. (n=5)                                                                                                     | ..lower prices may allow more people to receive treatment...” PATIENT04                                                                                                                                                                        |
|                                             | Patients may start biological treatment earlier. (n=3)                                                                                                          | “.. maybe one should not focus only on savings here but just how you can treat patients at an earlier stage..” INDUSTRY05                                                                                                                      |
|                                             | New drug treatments can be introduced without compromising sustainability of pharmacotherapy. (n=2)                                                             | “.. with the savings these innovative medicines can be offered to more patients..” PHARMACIST08                                                                                                                                                |
| <b>Continuity of treatments</b>             | Treatment can continue smoothly with another product if there is a medicine shortage. (n=4)                                                                     | “.. if they were in a kind of generic substitution, there would more tools for these disruptions.” PHARMACIST05                                                                                                                                |
|                                             | Decreasing prices can increase the pharmacy's willingness to keep the products in stock. (n=2)                                                                  | “And, of course, depending on which price category the product is, if it is always available in the pharmacy as for example insulin, as soon as patient gets his medicine , he can start using it immediately.” PHARMACIST01                   |
|                                             | Patients may receive a three-month dose of reimbursed medication at the same time if the price of the product falls sufficiently. (n=1)                         | “So if that price dropped so much that the customer would get it [dispensed medicine] more to take with, and on the other hand it would be a good thing for the customer not to visit pharmacy every month ..” PHARMACIST14                    |
|                                             | Treatment can continue smoothly with another reimbursed product if there is a change in the reimbursement status of the patient’s current medicine brand. (n=1) | "But even in this situation [the original product is not reimbursed any more] if you speculate that there is a drug substitution and you can switch directly to the biosimilar, so this recipe ‘exchange rally’ is much smaller.” PHARMACIST01 |
|                                             | Automatic substitution could improve immediate availability if pharmacies were aware of the product that has to be dispensed. (n=1)                             | “..for example, in this Neupogen® case, you should keep four different products in stock when you don’t know what the doctor prescribes, but with the substitution you only need one product to start the treatment..” AUTHORITY18             |

### The perceived medication safety risks and their management

Most of the risks with biologics' substitution identified in the interviews were related to the interruption or complication of patient's pharmacotherapy because of issues such as inadequate knowledge of the administration device (n=19), medicine availability problems (n=12) or patient's distrust to the biosimilar medicine itself (n=11) (Table 3). For example, differences in packages and complex naming (n=11) can introduce a risk for duplicate therapy. Traceability of the dispensed product name and batch number (due to long-term side effects; n=8, or unavailability of the dispensed product name or batch number; n=5), and insufficient availability of healthcare contacts (n=12) were also identified as medication safety risks in substitution in several comments. Lack of appropriate training for patients in the pharmacy and the inconsistencies between the pharmaceutical product-specific patient information materials were mentioned as risks in some interviews.

Several methods to minimize medication safety risks were proposed in the interviews. Medication and device counselling provided by pharmacists (n=23), infrequent substitution interval (n=15), and better knowledge on biosimilars among healthcare providers (n=13) were identified as potential remedies in multiple interviews.

**Table 3** Perceived medication safety risks and their management measures as identified in the interviews (n=32)<sup>a</sup>.

| Potential risk                                                                                  | Descriptions of perceived risks with manifestation                                                                                                                                                                                                                                                                                                                                                                                                                                               | Methods to minimize risk as identified in the interviews (n=32)                                                                                                                                                                                                                                                                                                                                                                                                                                                                                                                                                                                                                                                                                                                                                                                                                                                                                                                                                                                                                                                                                                                                                                                                                                                                                                                                                                                                                                                                                                                                                                     |
|-------------------------------------------------------------------------------------------------|--------------------------------------------------------------------------------------------------------------------------------------------------------------------------------------------------------------------------------------------------------------------------------------------------------------------------------------------------------------------------------------------------------------------------------------------------------------------------------------------------|-------------------------------------------------------------------------------------------------------------------------------------------------------------------------------------------------------------------------------------------------------------------------------------------------------------------------------------------------------------------------------------------------------------------------------------------------------------------------------------------------------------------------------------------------------------------------------------------------------------------------------------------------------------------------------------------------------------------------------------------------------------------------------------------------------------------------------------------------------------------------------------------------------------------------------------------------------------------------------------------------------------------------------------------------------------------------------------------------------------------------------------------------------------------------------------------------------------------------------------------------------------------------------------------------------------------------------------------------------------------------------------------------------------------------------------------------------------------------------------------------------------------------------------------------------------------------------------------------------------------------------------|
| <p><b>The patient's medication is interrupted or complicated temporarily or permanently</b></p> | <p><b>The patient does not know how or is unable to use the administration device correctly (n=19)</b></p> <ul style="list-style-type: none"> <li>The patient feels that the new administration device is difficult to use.</li> <li>Patient fails to administer medicine or he/she is not able to repeat administration</li> <li>New administration device is not suitable for the patient (handicap, visual impairment)</li> <li>Too wide a range of different devices is available</li> </ul> | <ul style="list-style-type: none"> <li>Pharmacy provides medication counselling including device counselling with optional injection training (n=23)</li> <li>The interval* between substitutions should be longer for biological drugs than for generic medicines (n=15)</li> <li>Further training of healthcare professionals on biosimilars (n=13)</li> <li>Consistent, positive attitude towards substitution across healthcare and pharmacies (n=9)</li> <li>A motivating conversation with the patient by a doctor and nurse (n=8)</li> <li>Ensuring at every pharmacy and health care visit that the patient can use the device correctly (n=8)</li> <li>Medication monitoring (n=8)</li> <li>The patient knows where to contact in case of problems (n=7)</li> <li>Prescriber can prohibit substitution if necessary (n=7)</li> <li>Evaluation of the interchangeability of devices in a regulatory process (n=6)</li> <li>Dispensing of biologics based on an appointment or pre-order (n=6)</li> <li>Switches and substitution are avoided if medication has not in stabilized (n=6)</li> <li>Evaluation of biological medicines suitable for substitution by the regulatory authority (n=6)</li> <li>Post-marketing surveillance of medicines (n=5)</li> <li>Regional co-ordination / co-operation between healthcare and pharmacies (n=4)</li> <li>Substitution policy prevents shortages by supporting pharmaceutical companies to anticipate the market (n=3)</li> <li>Mandatory reserve supplies of biological medicines (n=2)</li> <li>Providing reliable drug information sources for the patient (n=2)</li> </ul> |
|                                                                                                 | <p><b>The medicine is not available at the right time (n=12)</b></p> <ul style="list-style-type: none"> <li>The pharmacy does not have the product in stock</li> <li>There is a medicine shortage</li> </ul>                                                                                                                                                                                                                                                                                     |                                                                                                                                                                                                                                                                                                                                                                                                                                                                                                                                                                                                                                                                                                                                                                                                                                                                                                                                                                                                                                                                                                                                                                                                                                                                                                                                                                                                                                                                                                                                                                                                                                     |
|                                                                                                 | <p><b>The patient does not trust the new medicine (n=11)</b></p> <ul style="list-style-type: none"> <li>The patient has benefited significantly from the original product and does not want to change.</li> <li>The patient receives conflicting messages from different healthcare professionals.</li> <li>The substitution will surprise the patient at the pharmacy.</li> <li>Patient is suspicious due to different product appearance and trade names.</li> </ul>                           |                                                                                                                                                                                                                                                                                                                                                                                                                                                                                                                                                                                                                                                                                                                                                                                                                                                                                                                                                                                                                                                                                                                                                                                                                                                                                                                                                                                                                                                                                                                                                                                                                                     |
|                                                                                                 | <p><b>The patient experiences adverse reactions after substitution (n=11)</b></p> <ul style="list-style-type: none"> <li>Reactions to excipients</li> <li>Nocebo-effect</li> <li>Large-scale substitution may reveal problems that were not previously detected</li> </ul>                                                                                                                                                                                                                       |                                                                                                                                                                                                                                                                                                                                                                                                                                                                                                                                                                                                                                                                                                                                                                                                                                                                                                                                                                                                                                                                                                                                                                                                                                                                                                                                                                                                                                                                                                                                                                                                                                     |
|                                                                                                 | <p><b>Concern about losing the medicine's effectiveness (n=8)</b></p> <ul style="list-style-type: none"> <li>The development of drug antibodies is accelerated by repetitive switches</li> <li>There is no large-scale experience on repetitive switches</li> </ul>                                                                                                                                                                                                                              |                                                                                                                                                                                                                                                                                                                                                                                                                                                                                                                                                                                                                                                                                                                                                                                                                                                                                                                                                                                                                                                                                                                                                                                                                                                                                                                                                                                                                                                                                                                                                                                                                                     |
| <p><b>The patient uses two products with the same active substance</b></p>                      | <p><b>Based on the appearance or name of the product, it is not possible to determine whether the active substance is the same (n=11)</b></p> <ul style="list-style-type: none"> <li>Different appearance of packages</li> <li>Different trade names</li> <li>Generic names can be confusing</li> <li>Patient recognises only the established brand name</li> </ul>                                                                                                                              | <ul style="list-style-type: none"> <li>Demonstrating administration devices in drug counselling (visuality) (n=9)</li> <li>Prescriber can prohibit substitution (n=7)</li> <li>Printing drug lists and checking medication (n=1)</li> <li>The new product is marked with a label that indicates the substitution (n=1)</li> <li>The new product is not delivered too early, so the patient does not have two products at the same time at home. (n=1)</li> <li>Pharmacist invalidates the previous prescription when substituting (n=1)</li> </ul>                                                                                                                                                                                                                                                                                                                                                                                                                                                                                                                                                                                                                                                                                                                                                                                                                                                                                                                                                                                                                                                                                  |
|                                                                                                 | <p><b>The patient does not understand that substitution has taken place (n=8)</b></p>                                                                                                                                                                                                                                                                                                                                                                                                            |                                                                                                                                                                                                                                                                                                                                                                                                                                                                                                                                                                                                                                                                                                                                                                                                                                                                                                                                                                                                                                                                                                                                                                                                                                                                                                                                                                                                                                                                                                                                                                                                                                     |

| Potential risk                                                                  | Descriptions of perceived risks with manifestation                                                                                                                                                                                                                                                                                                                                                                                                     | Methods to minimize risk as identified in the interviews (n=32)                                                                                                                                                                                                                                                                                                                                                                                                                                                                                                                                                                                                                                                                                |
|---------------------------------------------------------------------------------|--------------------------------------------------------------------------------------------------------------------------------------------------------------------------------------------------------------------------------------------------------------------------------------------------------------------------------------------------------------------------------------------------------------------------------------------------------|------------------------------------------------------------------------------------------------------------------------------------------------------------------------------------------------------------------------------------------------------------------------------------------------------------------------------------------------------------------------------------------------------------------------------------------------------------------------------------------------------------------------------------------------------------------------------------------------------------------------------------------------------------------------------------------------------------------------------------------------|
|                                                                                 | <ul style="list-style-type: none"> <li>Patients with polypharmacy, the elderly, patients with impaired cognition</li> </ul> <p><b>The patient has two prescriptions for the same active substance (n=3)</b></p> <ul style="list-style-type: none"> <li>The patient has a prescription for the original product and another prescription for the biosimilar</li> </ul>                                                                                  |                                                                                                                                                                                                                                                                                                                                                                                                                                                                                                                                                                                                                                                                                                                                                |
| <b>The traceability of the product is compromised.</b>                          | <p><b>The biological drug can have long term side effects (n=8)</b></p> <ul style="list-style-type: none"> <li>The product that caused a side effect cannot be traced</li> </ul> <p><b>In case of a side effect, the product cannot be traced (n=5)</b></p> <ul style="list-style-type: none"> <li>The physician is not aware of what brand and what batch the patient has used</li> <li>Patient refers only to the originator's brand name</li> </ul> | <ul style="list-style-type: none"> <li>The interval between substitutions should be longer for biologics than for generic medicines (n=15)</li> <li>Promoting two-way information sharing between pharmacy and health care services (n=10)</li> <li>Switches and substitution are avoided if medication has not stabilized (n=6)</li> <li>Introduction of a drug certification system (automatic registration of the dispensed package and batch) (n=6)</li> <li>Development of information systems so that the batch number of the delivered product is also registered in the electronic prescription center (n=4)</li> <li>Prescriber can check the brand name of the Flied medicine at the electronic prescription center (n=3)</li> </ul> |
| <b>The patient cannot get into healthcare in case of problems</b>               | <p><b>Health care is overloaded due to substitution (n=12)</b></p> <ul style="list-style-type: none"> <li>Substitution increases patient contact with health care</li> <li>Patients with substituted medicine would be in closer follow-up</li> </ul> <p>The patient contacts the physician to obtain a substitution refusal</p>                                                                                                                       | <ul style="list-style-type: none"> <li>Further training of healthcare professionals on biosimilars (n=13)</li> <li>Consistent, positive attitude towards substitution across healthcare and various pharmacies (n=9)</li> <li>A motivating conversation with the patient by a doctor and nurse (n=8)</li> </ul>                                                                                                                                                                                                                                                                                                                                                                                                                                |
| <b>The patient does not receive substitution-related advice from a pharmacy</b> | <p><b>'On behalf of the patient' customers (n=5)</b></p> <ul style="list-style-type: none"> <li>For example, a relative can apply for a medicine on behalf of a patient</li> </ul> <p><b>New methods to dispense medicines (n=1)</b></p> <ul style="list-style-type: none"> <li>The patient can apply for a medicine from the "smart box" when convenient</li> </ul>                                                                                   | <ul style="list-style-type: none"> <li>Medication counselling with both visual and written material (n=7)</li> <li>Prescriber can prohibit substitution (n=7)</li> </ul>                                                                                                                                                                                                                                                                                                                                                                                                                                                                                                                                                                       |
| <b>The patient is distracted by the support material he receives</b>            | <p><b>There may be differences in written material received by the patient (n=2)</b></p> <ul style="list-style-type: none"> <li>Material for various products is accumulated</li> </ul> <p><b>The availability of additional materials may vary by product (n=2)</b></p> <ul style="list-style-type: none"> <li>Pharmaceutical company supplies additional product-specific material such as web pages, storage and shipping boxes, etc.</li> </ul>    | <ul style="list-style-type: none"> <li>Generic and harmonized risk minimization materials (n=2)</li> </ul>                                                                                                                                                                                                                                                                                                                                                                                                                                                                                                                                                                                                                                     |

\* In Finland, the substitution interval for generic small molecules (generic substitution interval) e.g. how often patient's medicine could be substituted at the pharmacy, is related to the reference price that establish the reimbursement level, and is confirmed quarterly (reference price interval).<sup>73</sup>

<sup>9)</sup>Please note, "patient perspective" can be either patient representative's view or other stakeholder representative's assumption on patient's view.

### Substitution frequency

The interviewees were asked about optimal substitution interval for biologics. Only three interviewees agreed that the current generic substitution interval of three months (e.g. how often the medicine could be substituted in the pharmacy<sup>5</sup>) would be suitable for biologics and none recommended to have an interval of one month. The most popular interval for substitution was 12-24 months (n=13). In some interviews the participants did not want to mention any precise frequency but mentioned that it “should be done rarely”. Both the validity period of a prescription and the adjusted reference price intervals for biologics were suggested to determine the interval of biologics’ substitution.

Participants suggested an association between substitution frequency and medication safety and pharmaceutical market attractiveness (Table 4). It was suggested that a long substitution interval may increase medication safety compared to shorter intervals. On the other hand, pharmaceutical companies’ interest to enter local pharmaceutical market may be compromised if the substitution interval is too long.

**Table 4** Influence of the substitution frequency on medication safety and attractiveness of the pharmaceutical market in Finland emphasized in the stakeholders’ interviews (n=32).

|                                                | SHORT SUBSTITUTION INTERVAL                                                                                                                                                                                                                                                                                                                                                                                                    | LONG SUBSTITUTION INTERVAL                                                                                                                                                                                                                                                                                                                                  |
|------------------------------------------------|--------------------------------------------------------------------------------------------------------------------------------------------------------------------------------------------------------------------------------------------------------------------------------------------------------------------------------------------------------------------------------------------------------------------------------|-------------------------------------------------------------------------------------------------------------------------------------------------------------------------------------------------------------------------------------------------------------------------------------------------------------------------------------------------------------|
| <b>Medication safety</b>                       | <p><b>Positive impact on</b></p> <ul style="list-style-type: none"> <li>Continuation of treatment in case of shortages of a particular product</li> </ul> <p><b>Negative impact on</b></p> <ul style="list-style-type: none"> <li>Device expertise of the patient</li> <li>Traceability of the product and batch number</li> <li>Management of support material for the patient</li> <li>Concerns on immunogenicity</li> </ul> | <p><b>Positive impact on</b></p> <ul style="list-style-type: none"> <li>Device expertise of the patient</li> <li>Traceability of the product and batch number</li> <li>Management of additional patient material</li> </ul> <p><b>Negative impact on</b></p> <ul style="list-style-type: none"> <li>Continuity of treatment in case of shortages</li> </ul> |
| <b>Attractiveness of pharmaceutical market</b> | <p><b>Negative impact on</b></p> <ul style="list-style-type: none"> <li>Predictability of pharmaceutical market</li> <li>Stock management in pharmacies</li> </ul> <p><b>Uncertain impact on</b></p> <ul style="list-style-type: none"> <li>Competition between products</li> </ul>                                                                                                                                            | <p><b>Positive impact on</b></p> <ul style="list-style-type: none"> <li>Predictability of pharmaceutical market</li> <li>Stock management in pharmacies</li> </ul> <p><b>Negative impact on</b></p> <ul style="list-style-type: none"> <li>Competition between products (prevents rapid reaction to price changes)</li> </ul>                               |

### Tasks and responsibilities of the patients and health care professionals

Automatic substitution was predicted to bring new tasks to community pharmacists (Figure 1). Lack of information sharing between community pharmacists and nurses who are involved in patient counselling was noted in several interviews. It was highlighted by interviewees that this information pathway should be developed for effective and consistent counselling on administration devices for patients. Multiple interviewees stated that collaboration between teams in healthcare and pharmacies should be improved before introducing automatic substitution of biologics. On the other hand, patients' role as a partner was discussed by the various interviewees.

*Add Figure 1 here.*

For peer review only



## DISCUSSION

The stakeholders had a generally positive attitude to the biologics' substitution at the pharmacy level. Treatment naïve patients were regarded as the most suitable targets for substitution. The stakeholders identified several benefits and risks related to automatic substitution of biologics. Many of the risks that were identified in the interviews are applicable also to generic substitution, such as patients' expected distrust towards a new medicine and a parallel use of the same active ingredients in different products (Table 3). Traceability of the dispensed product name and batch number, and patients' knowledge and training for a new administration device were identified as risks that are not shared with generic substitution. On the other hand, multiple mitigation measures against medication safety hazards were also identified, such as infrequent substitution interval, improved knowledge of biosimilars among healthcare personnel and administration device counselling at pharmacies. These measures can allocate some new tasks to community pharmacists.

### Education of healthcare providers and patient counselling

Our study indicates that the personnel in healthcare units and community pharmacies need substantial detailed information on biosimilars, which is consistent to previous findings.<sup>30-32</sup> The outcome of automatic substitution may be negatively influenced if the provided information is ambiguous or not sufficiently detailed.<sup>33</sup> The attitudes of the prescriber or other providers towards substitution have been shown to have an impact on the patient's acceptance to switch medicine and the perceived outcome of the switch.<sup>34-35</sup> In generic substitution, lack of appropriate information has been shown to be confusing and raise doubts regarding the quality, safety and efficacy of the generic product.<sup>36-38</sup>

Regarding the experience of generic substitution, it is important to provide consistent information to patients about biosimilars, the reasons for the switch, and the product in question. Based on the assessment by the regulatory authorities, the marketing authorization holder may be required to produce risk minimization material, such as patient "alert cards" used to manage the adequate monitoring of treatment.<sup>39</sup> In general, the risk minimization material of biosimilars should be consistent with the information of the reference product. In order to avoid confusion among patients, these materials should be as harmonized as possible.<sup>39</sup>

Our study identified potentially new roles for community pharmacists to facilitate safe and effective substitution of biologics. In Finland, the patient counselling on any biological medicine is usually given by the prescribers and nurses. Community pharmacists are obligated by law to ensure that the patients know

1  
2  
3 the appropriate use of medicinal products, including administration devices.<sup>40</sup> Thus, all suggested new roles  
4 are already within the current mandate of the Finnish pharmacies. Nevertheless, it seems that introducing  
5 the substitution of biologics would require a major effort to educate and train pharmacy staff in dealing  
6 with biologics and their administration devices as well as in patient counselling. General information on  
7 biosimilars and their interchangeability is available in local languages and can be tailored to the needs of  
8 the pharmacies.<sup>41</sup> Ideally, pharmacies and local health care units should collaborate in developing patient  
9 counselling materials and techniques in order to increase synergy and to avoid overlapping work.  
10  
11  
12  
13  
14  
15  
16  
17

### 18 **Administration devices**

19  
20 According to our findings, patient's knowledge of use of the administration devices is one of the key factors  
21 to the success of substitution. The different administration devices can present an obstacle to switching.<sup>42</sup>  
22 However, all administration devices for biosimilars and their reference products have been tested for  
23 usability at the time of marketing authorization.<sup>43</sup> Still, there may be clinically relevant differences in the  
24 usability of different devices, as experienced by the patient. Thus, to assure safe substitution the national  
25 authority will need to assess the suitability of administration devices for substitution in all relevant patient  
26 groups. For instance, substitution may involve the use of a different type of device, such as an autoinjector  
27 instead of a prefilled syringe. The risk for clinically relevant problems when using different administration  
28 devices can be minimized with adequate patient counselling, including device training, and good  
29 communication within medication management team (Figure 1). The pharmacy staff should be able to  
30 provide the necessary device training if the patient or caregiver is unfamiliar with the new device in order  
31 to ensure the appropriate administration of the product.  
32  
33  
34  
35  
36  
37  
38  
39  
40  
41  
42

### 43 **"Dispense as written"**

44  
45 According to previous studies, physicians have reservations regarding automatic substitution.<sup>44-49</sup> Some  
46 physicians seem to be hesitant to accept automatic substitution of biologics because of the perceived  
47 limitation of the physician's autonomy.<sup>50-51</sup> This was also identified in recent Finnish study.<sup>52</sup> This view can  
48 be challenged, since substitution of biosimilars, like generic substitution, deals with therapeutically  
49 equivalent products. The need for automatic substitution is driven by insufficient cost consciousness of  
50 prescribers who are major players in the channeling of public funds.<sup>53</sup>  
51  
52  
53  
54  
55

56 Nevertheless, there may be situations in which substitution is not appropriate. According to the local  
57 legislation, the prescribers can prohibit generic substitution by writing the prescription with a "dispense as  
58 written" designation.<sup>34, 54-55</sup> The interviewees in our study suggested that this may also be necessary in  
59  
60

1  
2  
3 substitution of biologics. For instance, the patient may not have reached an optimal treatment response  
4 with the present medicinal product. In this case, substitution needs to be postponed until a rational  
5 decision can be made either to substitute or to prescribe a product with a different active substance.  
6  
7 Substitution may also be inappropriate if the patient will not be able to use the new product due to physical  
8 handicap or other relevant reasons. Nevertheless, the patients and healthcare providers may also consider  
9 a new device as easier to use.<sup>56-58</sup> It is important that the physicians will have to present a clinically sound  
10 justification if they wish to prohibit the substitution.  
11  
12  
13  
14  
15  
16  
17

### 18 **Substitution interval**

19  
20 One of the concerns related to substitution was related to the frequency of switches. The stakeholders  
21 seemed to favor longer switching intervals for practical and safety reasons. Frequent switching could  
22 overload the pharmacies in patient counselling and increase the risk of medication errors and potential  
23 switch-related adverse effects, such as nocebo effect. Multiple switches may also confuse patients and  
24 their caregivers.<sup>42</sup> Troubleshooting may also be difficult in cases of frequent switching and adverse effects  
25 with long latency, such as immunogenicity and loss of efficacy. A long switching interval may also increase  
26 the predictability of the market and simplify the logistics and the management of the stock in the  
27 pharmacies, especially for expensive biologics with limited shelf life. Thus, the optimal substitution interval  
28 for biologics should be determined by several factors, both theoretical and practical.  
29  
30  
31  
32  
33  
34  
35  
36  
37

### 38 **Traceability**

39  
40 Traceability has been presented as a problem of biosimilar uptake, especially upon substitution.<sup>59</sup> In  
41 contrast to general perception, traceability of biosimilars and their reference products has been shown to  
42 be adequate.<sup>60</sup> The main challenge in traceability of all biologics is the poor reporting of the batch numbers  
43 by healthcare personnel. In contrast, the pharmacies in Finland are already obligated to record the batch  
44 numbers of all dispensed biological medicines.<sup>61</sup> Thus, there is a good argument that traceability would be  
45 optimized at the pharmacy level. One issue that needs to be overcome, however, is that this information is  
46 not automatically transferred to patient records. Nonetheless in Finland, it is possible for a prescriber to  
47 find the brand name of the dispensed medicine in the electronic archive of prescriptions.<sup>62</sup> Similar helpful IT  
48 systems may be available or in development in other countries. In addition, traceability will be further  
49 improved in the EU by the recently introduced unique identifiers of all packages of prescribed medicinal  
50 products.<sup>63</sup> Nevertheless, the information flow between the health care units and community pharmacies  
51 should be improved.  
52  
53  
54  
55  
56  
57  
58  
59  
60

### Practical and policy implications

The marketing authorization of biosimilar therapeutic proteins is based on the recommendation of the European Medicines Agency and granted by the European Commission whereas the interchangeability and substitutability are under responsibility of EU Member States.<sup>64</sup> Thus, each Member State has to develop its own procedures to assess interchangeability. For example in Finland, automatic substitution of generics is assessed for each new product entering the market.<sup>65</sup> A separate assessment of substitutability needs to be done in EU Member states for every new biosimilar as well if substitution is pursued. This assessment should include the dosage forms, administration devices and available product information. Instead, in the United States, interchangeability of biologics is considered as an extension of the biosimilar status including additional clinical switching studies.<sup>66</sup> In states where legislation allows, pharmacist can substitute products with interchangeability status.<sup>66-67</sup> Substitution is allowed in some other countries, for example in France and Australia.<sup>68</sup> Despite the legal basis, clear guidance for substitution practice and patient counselling is needed.<sup>69</sup>

Small price difference between reference product and biosimilar is not encouraging physicians to switch.<sup>52</sup> However, substitution between the reference products and their biosimilars may be crucial not only for savings and price competition but also for practical and logistical reasons of limiting the number of products that must be stocked in the pharmacy.<sup>67</sup>

### Needs for further research

Considering substitution in practice, it may be appropriate to pilot the chosen model for substitution before adopting the policy in full-scale. Practical, safety, and economical aspects should be monitored and studied during the pilot phase in order to obtain comprehensive understanding of substantial benefits and risks as well as market dynamics associated with implementing substitution for biologics.

This study pointed out that pharmacist provided patient counselling is an important factor to ensure the medication safety in biologics' substitution. Despite the emerging biologic substitution experience in some countries, the content of the information that community pharmacists should provide to the patients and caregivers has not been studied nor reported.<sup>68-70</sup> Especially, studies exploring patient perspective to biologics' automatic substitution are needed.

### Limitations of the study

Although a wide range of stakeholders participated in the interviews, the community pharmacists and authorities constituted the majority of the participants. The limited number of patients and nurses compared with other stakeholder representatives may have skewed the results. This may have been partially compensated by the views expressed by non-patients as "patient perceptions". However, there is often a difference between what patients actually think and what health care professionals believe patients to think.

The views of different professions were grouped together. This was because the aim of this study was to explore views from different stakeholders to build up a model for automatic substitution of biologics rather than to compare differences in opinions between stakeholder groups. We intentionally merged individual and pair/group interviews because the stakeholders nominated a varying number of representatives to be interviewed. In each interview, the participants represented only one stakeholder group, which might have mitigated differences in dynamics of these approaches. The challenge to combine these two methods led to the decision to analyze the data on the level of the interviews, not by each interviewee.

Finally, similar to all qualitative research, it is not possible to fully remove researcher bias. It should be noted that the results reflect the local circumstances in Finland and may not as such be applicable to other EU countries. However, the majority of issues covered here are common to many European health care systems.

### CONCLUSIONS

Perceptions of the stakeholders on automatic substitution for biologics at the pharmacy level were more positive than in previous studies. Several reservations were presented, and risk mitigation measures were deemed necessary.

The identified medication safety risks can be mitigated by an appropriate substitution model developed in collaboration with relevant stakeholders and piloted in pharmacies. Each biosimilar product should be assessed for the critical factors, such as relevant product information (in relation to substitution), presentations, and administration devices. The substitution also introduces new tasks and communication needs to those involved in actual medication use process, particularly to community pharmacists who will be responsible for substitution and counselling the patients. Electronic systems, such as electronic prescribing, pharmacy IT systems, and unique identifiers of packages, are helpful for traceability. Consistent and unbiased information should be made available to all substitution stakeholders. The clinical and economical outcomes of substitution should be monitored after institution of routine substitution.

**ACKNOWLEDGEMENTS**

We thank all the participants in the interviews. We would also like to warmly thank the project group in Finnish Medicines Agency Fimea.

**CONTRIBUTORS**

HMT, MA, PR, KHA and PK contributed to the conception or study design. HMT was principal investigator to acquire and analyze the data, and draft the manuscript. All authors (HMT, MA, PR, KHA, KMS and PK) participated in interpretation of the data and critical revision of the manuscript. All authors approved the final version.

**FUNDING**

This work was funded by Finnish Medicines Agency Fimea and supported by University Pharmacy, Helsinki, grant.

**COMPETING INTERESTS**

HMT has participated a congress for which participation fee was sponsored by Roche Oy

**PATIENT CONSENT**

Not required.

**DATA SHARING**

All requests should be directed to the corresponding author.

1  
2  
3 **REFERENCES**  
4

- 5  
6 1 European Commission, DG Enterprise and industry. What you need to know about biosimilar medicinal  
7 products. Process on corporate responsibility in the field of pharmaceuticals access to medicines in Europe.  
8 A consensus information document, 2013.  
9 <https://ec.europa.eu/docsroom/documents/8242/attachments/1/translations/en/renditions/pdf> (accessed  
10 Apr 2019)
- 11  
12 2 Blackstone EA, Fuhr JP. The economics of biosimilars. *Am Health Drug Benefits*2013;6:469-78.
- 13  
14 3 European Medicines Agency. Guideline on similar biological medicinal products CHMP/437/04 Rev 1,  
15 2014. [https://www.ema.europa.eu/documents/scientific-guideline/guideline-similar-biological-medicinal-](https://www.ema.europa.eu/documents/scientific-guideline/guideline-similar-biological-medicinal-products-rev1_en.pdf)  
16 [products-rev1\\_en.pdf](https://www.ema.europa.eu/documents/scientific-guideline/guideline-similar-biological-medicinal-products-rev1_en.pdf). (accessed Dec 2018)
- 17  
18 4 IQVIA. The Impact of Biosimilar competition in Europe 2018.  
19 <https://ec.europa.eu/docsroom/documents/31642> (accessed Apr 2019)
- 20  
21 5 Finnish Medicines Agency and Social Insurance Institution. Finnish Statistics on Medicine 2017.  
22 <http://urn.fi/URN:NBN:fi-fe2018112148808> (accessed Apr 2019)
- 23  
24 6 Ruokoniemi P. Rational prescribing, dispensing and use of medicines in current and future healthcare and  
25 social welfare structures. Reports and Memorandums of the Ministry of Social Affairs and Health 12/2018,  
26 Helsinki: Ministry of Social Affairs and Health 2018
- 27  
28 7 Mansilla C, Cárdenas J, Kaplan WA, *et al*. Evaluation of the effects of a generic substitution policy  
29 implemented in Chile. *BMJ Glob Health*2019;2:e000922. doi:10.1136/  
30 [bmjgh-2018-000922](https://doi.org/10.1136/bmjgh-2018-000922)
- 31  
32 8 Aalto-Setälä V. The impact of generic substitution on price competition in Finland. *Eur J Health*  
33 *Econ*2008;9:185-91.
- 34  
35 9 Andersson K, Sonesson C, Petzold M, *et al*. What are the obstacles to generic substitution? An assessment  
36 of the behaviour of prescribers, patients and pharmacies during the first year of generic substitution in  
37 Sweden. *Pharmacoepidemiol Drug Saf*2005;14:341-8.
- 38  
39 10 Stadhouders N, Kruse F, Tanke M, *et al*. Effective healthcare cost-containment policies: A systematic  
40 review. *Health Policy*2019;123:71-9. doi: 10.1016/j.healthpol.2018.10.015.
- 41  
42 11 van der Plas RM, van Zwieten-Boot BJ, Hoefnagel M, *et al*. The EU regulatory approach to generics and  
43 biosimilars is essentially similar. *GABI Journal*2015;4:9-10. doi: 10.5639/gabij.2015.0401.004
- 44  
45 12 European Medicines Agency and European Commission. Biosimilars in the EU. Information guide for  
46 healthcare professionals. European Medicines Agency, 2017.  
47 [https://www.ema.europa.eu/en/documents/leaflet/biosimilars-eu-information-guide-healthcare-](https://www.ema.europa.eu/en/documents/leaflet/biosimilars-eu-information-guide-healthcare-professionals_en.pdf)  
48 [professionals\\_en.pdf](https://www.ema.europa.eu/en/documents/leaflet/biosimilars-eu-information-guide-healthcare-professionals_en.pdf) (accessed Apr 2019)
- 49  
50 13 Kurki P, van Aerts L, Wolff-Holz E, *et al*. Interchangeability of Biosimilars: A European Perspective.  
51 *BioDrugs*2017;31:83-91. doi:10.1007/s40259-017-0210-0 [published Online First: 24 January 2017].
- 52  
53 14 Cohen HP, Blauvelt A, Rifkin RM, *et al*. Switching reference medicines to biosimilars: a systematic  
54 literature review of clinical outcomes. *Drugs*2018;78:463-78. doi: 10.1007/s40265-018-0881-y [published  
55 Online First: 3 March 2018].
- 56  
57 15 Inotai A, Prins CPJ, Csanádi M, *et al*. Is there a reason for concern or is it just hype? - A systematic  
58 literature review of the clinical consequences of switching from originator biologics to biosimilars. *Expert*  
59 *Opin Biol Ther*2017;17:915-26. doi: 10.1080/14712598.2017.1341486
- 60



- 1  
2  
3 16 McKinnon R, Cook M, Liauw W, et al. Biosimilarity and Interchangeability: Principles and Evidence: A  
4 Systematic Review. *BioDrugs*2018;32:27-52, 2018. doi: 10.1007/s40259-017-0256-z  
5
- 6 17 Blackwell K, Semiglazov V, Krasnozhan D, et al. Comparison of EP2006, a filgrastim biosimilar, to the  
7 reference: a phase III, randomized, double-blind clinical study in the prevention of severe neutropenia in  
8 patients with breast cancer receiving myelosuppressive chemotherapy. *Ann Oncol*2015;26:1948-53. doi:  
9 10.1093/annonc/mdv281.  
10
- 11 18 Blauvelt A, Lacour JP, Fowler JF, et al. Phase III randomized study of the proposed adalimumab biosimilar  
12 GP2017 in psoriasis: impact of multiple switches. *Br J Dermatol*2018;179:623-31. doi: 10.1111/bjd.16890.  
13
- 14 19 Glintborg B, Loft AG, Omerovic E, et al. To switch or not to switch: results of a nationwide guideline of  
15 mandatory switching from originator to biosimilar etanercept. One-year treatment outcomes in 2061  
16 patients with inflammatory arthritis from the DANBIO registry. *Ann Rheum Dis*2019;78:192-200, doi:  
17 10.1136/annrheumdis-2018-213474.  
18
- 19 20 Griffiths CEM, Thaçi D, Gerdes S, et al. The EGALITY study: a confirmatory, randomized, double-blind  
20 study comparing the efficacy, safety and immunogenicity of GP2015, a proposed etanercept biosimilar, vs.  
21 the originator product in patients with moderate-to-severe chronic plaque-type psoriasis. *Br J*  
22 *Dermatol*2017;176:928-38. doi: 10.1111/bjd.15152.  
23
- 24 21 Trifiro G, Marciano I, Ingrassiotta Y. Interchangeability of biosimilar and biological reference product:  
25 updated regulatory positions and pre- and post-marketing evidence. *Expert Opin Biol Ther* 2018;18:309-15  
26
- 27 22 Medicines for Europe. Positioning statements on physician-led switching for biosimilar medicines.  
28 Updated Jan 2019. [https://www.medicinesforeurope.com/wp-content/uploads/2017/03/M-Biosimilars-  
29 Overview-of-positions-on-physician-led-switching.pdf](https://www.medicinesforeurope.com/wp-content/uploads/2017/03/M-Biosimilars-Overview-of-positions-on-physician-led-switching.pdf) (accessed Apr2019)  
30
- 31 23 Mason J. Semistructured interview. In: Lewis-Beck MS, Bryman A, Futing Liao T, eds. The SAGE  
32 Encyclopedia of Social Science Research Methods. Sage Publications, Inc., Thousand Oaks, 2011.  
33 <http://sk.sagepub.com/reference/socialscience> (accessed Apr 2019)  
34
- 35 24 Edwards R, Holland J. What is qualitative interviewing?  
36 [http://eprints.ncrm.ac.uk/3276/1/complete\\_proofs.pdf](http://eprints.ncrm.ac.uk/3276/1/complete_proofs.pdf) (accessed May 2019)  
37
- 38 25 Richie J, Lewis J, Elam G et al. Designing and selecting samples. In: Ritchie J, Lewis J, McNaughton  
39 Nicholls C, Ormston R, eds. Qualitative Research Practice. A Guide for Social Science Students and  
40 Researchers. Great Britain: SAGE Publications Ltd 2014:111-45.  
41
- 42 26 Elo S, Kyngäs H. The qualitative content analysis process. *J Adv Nurs*2008;62:107-15 doi: 10.1111/j.1365-  
43 2648.2007.04569.x  
44
- 45 27 Pope C, Ziebland S, Mays N. Analysing qualitative data *BMJ*2000;320:114-6 doi:  
46 10.1136/bmj.320.7227.114  
47
- 48 28 Tong A, Sainsbury P, Craig J. Consolidated criteria for reporting qualitative research (Coreq): a 32-item  
49 checklist for interviews and focus groups. *Int J Qual Health Care*2007;19:349-57. doi:  
50 10.1093/intqhc/mzm042  
51
- 52 29 Finnish National Board of Research Integrity. Ethical review in human sciences.  
53 <https://www.tenk.fi/en/ethical-review-in-human-sciences> (accessed Aug 2018)  
54
- 55 30 Pouillon L, Danese S, Hart A, et al. Consensus report: clinical recommendations for the prevention and  
56 management of the nocebo effect in biosimilar-treated IBD patients. *Aliment Pharmacol Ther*2019;49:1181-  
57 7. <https://doi.org/10.1111/apt.15223>.  
58  
59  
60



1  
2  
3  
4  
5  
6  
7  
8  
9  
10  
11  
12  
13  
14  
15  
16  
17  
18  
19  
20  
21  
22  
23  
24  
25  
26  
27  
28  
29  
30  
31  
32  
33  
34  
35  
36  
37  
38  
39  
40  
41  
42  
43  
44  
45  
46  
47  
48  
49  
50  
51  
52  
53  
54  
55  
56  
57  
58  
59  
60

- 31 Giuliani R, Taberner J, Cardoso F, et al. Knowledge and use of biosimilars in oncology: a survey by the European Society for Medical Oncology. *ESMO Open*2019;4:e000460. doi:10.1136/esmoopen-2018-000460.
- 32 Leonard E, Wascovich M, Oskouei S, et al. Factors affecting health care provider knowledge and acceptance of biosimilar medicines: a systematic review. *J Manag Care Spec Pharm*2019;25:102-12. doi: 10.18553/jmcp.2019.25.1.102.
- 33 Scherlinger M, Langlois E, Germain V, et al. Acceptance rate and sociological factors involved in the switch from originator to biosimilar etanercept (SB4). *Semin Arthritis Rheum*2019;48:927-32. doi: 10.1016/j.semarthrit.2018.07.005.
- 34 Heikkilä R, Mäntyselkä P, Ahonen R. Why people refuse generic substitution: a population survey of public opinion on generic substitution in Finland. *Drugs Ther Perspect*2012;28:24–6
- 35 Malassigné M, Megne-Wabo M, Rigalleau V, et al. 4CPS-008 Impact of pharmaceutical interview in patient acceptance of insulin glargine's biosimilar 100UI/ml [abstract] *Eur J Hosp Pharm*2019;26:A71.
- 36 Håkonsen H, Eilertsen M, Borge H, et al. Generic substitution: additional challenge for adherence in hypertensive patients? *Curr Med Res Opin*2009;25:2515-21. doi: 10.1185/03007990903192223.
- 37 Bulsara C, McKenzie A, Sanfilippo F, et al. "Not the full Monty": a qualitative study of seniors' perceptions of generic medicines in Western Australia. *Aust J Prim Health*2010;16: 240-5.
- 38 Gill L, Helkkula A, Cobelli N, et al. How do customers and pharmacists experience generic substitution? *Int J Pharm Healthc Mark*2010;4:375-95
- 39 European Medicines Agency and Heads of Medicines Agencies. Guideline on good pharmacovigilance practices (GVP), Module XVI Addendum I – Educational materials. EMA/61341/2015. [https://www.ema.europa.eu/en/documents/regulatory-procedural-guideline/guideline-good-pharmacovigilance-practices-gvp-module-xvi-addendum-i-educational-materials\\_en.pdf](https://www.ema.europa.eu/en/documents/regulatory-procedural-guideline/guideline-good-pharmacovigilance-practices-gvp-module-xvi-addendum-i-educational-materials_en.pdf) (accessed Apr 2019)
- 40 Finnish Medicines Act 396/1987 <https://www.finlex.fi/fi/laki/ajantasa/1987/19870395> (accessed Apr 2019)
- 41 European Medicines Agency. Biosimilar medicines: overview. <https://www.ema.europa.eu/en/human-regulatory/overview/biosimilar-medicines-overview> (accessed May 2019)
- 42 Aladul MI, Fitzpatrick RW, Chapman SR. Healthcare professionals' perceptions and perspectives on biosimilar medicines and the barriers and facilitators to their prescribing in UK: a qualitative study *BMJ Open* 2018;8:e023603. doi: 10.1136/bmjopen-2018-023603
- 43 European Medicines Agency. Good practice guide on risk minimisation and prevention of medication errors [https://www.ema.europa.eu/en/documents/regulatory-procedural-guideline/good-practice-guide-risk-minimisation-prevention-medication-errors\\_en.pdf](https://www.ema.europa.eu/en/documents/regulatory-procedural-guideline/good-practice-guide-risk-minimisation-prevention-medication-errors_en.pdf) (accessed May 2019)
- 44 Beck M, Michel B, Rybarczyk-Vigouret M, et al. Rheumatologists' Perceptions of Biosimilar Medicines Prescription: Findings from a French Web-Based Survey. *BioDrugs*2016;30:585-92 doi: 10.1007/s40259-016-0202-5
- 45 Danese S, Fiorino G, Michetti P. Changes in biosimilar knowledge among European Crohn's Colitis Organization [ECCO] members: An updated survey. *J Crohns Colitis*2016;10:1362-5 doi: 10.1093/ecco-jcc/jjw090
- 46 Dolinar RO, Reilly MS. Biosimilars naming, label transparency and authority of choice -survey findings among European physicians. *GaBI Journal*2014;3:58-62 doi: 10.5639/gabij.2014.0302.018

- 1  
2  
3 47 O'Callaghan J, Bermingham M, Leonard M, et al. Assessing awareness and attitudes of healthcare  
4 professionals on the use of biosimilar medicines: A survey of physicians and pharmacists in Ireland. *Regul*  
5 *Toxicol Pharmacol*2017;88:252-61 doi: 10.1016/j.yrtph.2017.06.013.  
6
- 7 48 Gewanter HL, Reilly MS. Prescribing practices for biosimilars: questionnaire survey findings from  
8 physicians in Argentina, Brazil, Colombia and Mexico. *GaBI Journal*2015;4:161-6 doi:  
9 10.5639/gabij.2015.0404.036  
10
- 11 49 Grabowski D, Henderson B, Lam D, et al. Attitudes towards subsequent entry biologics/biosimilars: A  
12 survey of Canadian rheumatologists. *Clin Rheumatol*2015;34: 1427-33. doi:10.1007/s10067-014-2835-4.  
13
- 14 50 Dolinar RO, Reilly MS. Biosimilars naming, label transparency and authority of choice – survey findings  
15 among European physicians. *GaBI Journal*2014;3:58-62. doi: 10.5639/gabij.2014.0302.018  
16
- 17 51 Murby SP, Reilly MS. A survey of Australian prescribers' views on the naming and substitution of  
18 biologicals. *GaBI Journal*2017;6:107-13 doi: 10.5639/gabij.2017.0603.022  
19
- 20 52 Sarnola K, Merikoski M, Jyrkkä J, et al. Uptake of biosimilars in Finland – Physicians' views. Finnish  
21 Medicines Agency Fimea. *Serial Publication Fimea Develops, Assesses and Informs* 4/2019, 2019.  
22 <http://urn.fi/URN:ISBN:978-952-7299-02-9> (accessed May 2019)  
23
- 24 53 Chapman SR, Fitzpatrick RW, Aladul MI. Knowledge, attitude and practice of healthcare professionals  
25 towards infliximab and insulin glargine biosimilars: result of a UK web-based survey. *BMJ*  
26 *Open*2017;7(6):e016730. doi: 10.1136/bmjopen-2017-016730.  
27
- 28 54 Olsson E, Wallach-Kildemoes H, Ahmed B, et al. The influence of generic substitution on the content of  
29 patient-pharmacist communication in Swedish community pharmacies. *Int J Pharm Pract*2017;25:274-81.  
30 doi: 10.1111/ijpp.12299  
31
- 32 55 Shrank WH, Liberman JN, Fischer MA, et al. The consequences of requesting "dispense as written". *Am J*  
33 *Med*2011;124:309-17. doi: 10.1016/j.amjmed.2010.11.020.  
34
- 35 56 Egeth M, Soosaar J, Nash P, et al. Patient and Healthcare Professionals Preference for Brenzys vs. Enbrel  
36 Autoinjector for Rheumatoid Arthritis: A Randomized Crossover Simulated-Use Study. *Adv*  
37 *Ther*2017;34:1157-72. doi:10.1007/s12325-017-0523-x  
38
- 39 57 Tischer B, Mehl A. Patients' and nurses' preferences for autoinjectors for rheumatoid arthritis: results of  
40 a European survey. *Patient Prefer Adherence*2018; 212:1413-24. doi: 10.2147/PPA.S169339.  
41
- 42 58 Fenwick S, Thakur K, Munro D. Nurse and patient perceptions and preferences for subcutaneous  
43 autoinjectors for inflammatory joint or bowel disease: Findings from a European survey. *Rheumatol Ther*  
44 2019;6:195-206. doi: 10.1007/s40744-019-0144-8  
45
- 46 59 Mellstedt H. Clinical considerations for biosimilar antibodies. *EJC suppl*2013;11(3):1–11 doi:  
47 10.1016/S1359-6349(13)70001-6.  
48
- 49 60 Vermeer NS, Giezen TJ, Zastavnik S, et al. Identifiability of biologicals in adverse drug reaction reports  
50 received from European clinical practice. *Clin Pharmacol Ther*2019;105(4):962-9 doi:10.1002/cpt.1310.  
51
- 52 61 Finnish Medicines Agency. Lääkkeiden toimittaminen. [in Finnish] Dnro Fimea 003223/00.01.02/2016.  
53 [https://www.fimea.fi/documents/160140/764653/M%c3%a4%c3%a4r%c3%a4ys.pdf/9332fa84-d115-41e2-](https://www.fimea.fi/documents/160140/764653/M%c3%a4%c3%a4r%c3%a4ys.pdf/9332fa84-d115-41e2-b357-19eb28191312)  
54 [b357-19eb28191312](https://www.fimea.fi/documents/160140/764653/M%c3%a4%c3%a4r%c3%a4ys.pdf/9332fa84-d115-41e2-b357-19eb28191312) (accessed May 2019)  
55
- 56 62 Kanta Services, The Social Insurance Institution of Finland. Prescribing a medicine.  
57 <https://www.kanta.fi/en/professionals/prescribing-a-medicine> (accessed May 2019)  
58
- 59 63 EudraLex. Directive 2011/62/EU of the European Parliament and of the Council of 8 June 2011 amending  
60 Directive 2001/83/EC on the Community code relating to medicinal products for human use, as regards the

1  
2  
3 prevention of the entry into the legal supply chain of falsified medicinal products. In: Union OJ L, ed.  
4 Brussels: Official Journal of the European Union, 2011.

5  
6 64 EudraLex. Directive 2001/83/EC of the European Parliament and of the Council of 6 November 2001 on  
7 the Community code relating to medicinal products for human use (Consolidated version: 16/11/2012).  
8 [https://ec.europa.eu/health/documents/eudralex/vol-1\\_en](https://ec.europa.eu/health/documents/eudralex/vol-1_en) (Accessed May 2019).

9  
10 65 Finnish Medicines Agency. Substitutable medicinal products. Criteria used in compiling the list.  
11 [https://www.fimea.fi/web/en/databases\\_and\\_registeries/substitutable\\_medicinal\\_products/criteria\\_used](https://www.fimea.fi/web/en/databases_and_registeries/substitutable_medicinal_products/criteria_used_in_compiling_the_list)  
12 [\\_in\\_compiling\\_the\\_list](https://www.fimea.fi/web/en/databases_and_registeries/substitutable_medicinal_products/criteria_used_in_compiling_the_list) (Accessed May 2019).

13  
14 66 U.S. Department of Health and Human Services, Food and Drug Administration. Center for Drug  
15 Evaluation and Research (CDER), Center for Biologics Evaluation and Research (CBER). Considerations in  
16 Demonstrating Interchangeability with a Reference Product Guidance for Industry.  
17 [https://www.fda.gov/regulatory-information/search-fda-guidance-documents/considerations-](https://www.fda.gov/regulatory-information/search-fda-guidance-documents/considerations-demonstrating-interchangeability-reference-product-guidance-industry)  
18 [demonstrating-interchangeability-reference-product-guidance-industry](https://www.fda.gov/regulatory-information/search-fda-guidance-documents/considerations-demonstrating-interchangeability-reference-product-guidance-industry) (accessed May 2019)

19  
20 67 O'Callaghan J, Barry SP, Bermingham M, et al. Regulation of biosimilar medicines and current  
21 perspectives on interchangeability and policy. *Eur J Clin Pharmacol*2019;75:1-11. doi: 10.1007/s00228-018-  
22 2542-1

23  
24 68 Larkin H, Macdonald J, Lumsden R: Pharmacy-mediated substitution of biosimilars – a global survey  
25 benchmarking country substitution policies. *GaBi J*2017;6:157-64. doi: 10.5639/gabij.2017.0604.034

26  
27 69 Greene L, Singh RM, Carden MJ et al. Strategies for overcoming barriers to adopting biosimilars and  
28 achieving goals of the Biologics Price Competition and Innovation Act: A survey of managed care and  
29 specialty pharmacy professionals. *J Manag Care Spec Pharm*2019;22:1-9 doi: 0.18553/jmcp.2019.18412

30  
31 70 Moorkens E, Vulto AG, Huys I, et al. Policies for biosimilar uptake in Europe: An overview. *PLoS*  
32 *One*2017;12:e0190147. doi:10.1371/journal.pone.0190147

### 33 34 35 36 REFERENCES IN FIGURES OR TABLES

37  
38 T3 The Social Insurance Institution of Finland. Generic substitution and the reference price system.  
39 <https://www.kela.fi/web/en/medicine-expenses-generic-substitution-and-the-reference-price-system>  
40 (accessed Jun 2019)

### 41 42 43 44 45 LEGENDS OF THE FIGURES

46  
47  
48  
49  
50 **Figure 1** Existing interactions (black lines) between patients and healthcare professionals in biological  
51 medicine treatment in Finland and new tasks (red boxes) and new interactions (red dashed lines) between  
52 patients and healthcare professionals induced by automated substitution of biologics identified in the  
53 stakeholders' interviews (n=32).  
54  
55  
56  
57  
58  
59  
60

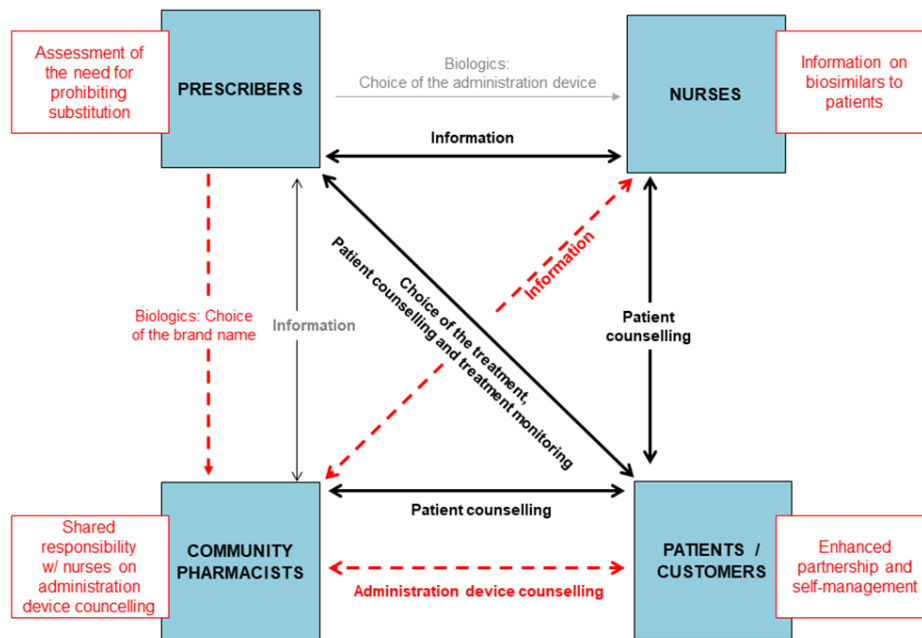

Existing interactions (black lines) between patients and healthcare professionals in biological medicine treatment in Finland and new tasks (red boxes) and new interactions (red dashed lines) between patients and healthcare professionals induced by automated substitution of biologics identified in the stakeholders' interviews (n=32).

90x90mm (300 x 300 DPI)

1  
2  
3 Supplement Material 1  
4  
5

6 Interview Guide and Example Questions  
7  
8  
9

10 **Theme 1 Background and attitudes towards substitution**

- 11 - Would you briefly describe how you are dealing with the generic substitution that is currently  
12 taking place in the community pharmacies?  
13  
14 - How well do you know the biological originator medicines and the biosimilars and how have you  
15 been dealing with them?  
16  
17 - What do you think about the possibility of biologics' substitution in the community pharmacies?  
18  
19 - Is the current generic substitution model also suitable for the implementation of the biologics'  
20 substitution?

21 **Theme 2 Medication safety of biologics' substitution**

- 22  
23 - What should be taken into account in order to ensure the medication safety if the substitution of  
24 biologics is introduced in the community pharmacies?  
25  
26 - How often could you expect the substitution would take place to an individual patient?  
27  
28 - Should the number of switches or timing of switches be limited in some manner?  
29  
30 - Considering substitution, there any differences between different indications or drugs?

31 **Theme 3 Prerequisites for substitution** (These questions are related to the community pharmacy activity.  
32 In the theme 3, issues were different for each perspective)

- 33 - Under what conditions do you consider that biologics substitution in community pharmacy could  
34 work?  
35  
36 - What kind of skills or training would be needed for community pharmacists?  
37  
38 - What should be considered for the implementation of drug counseling?  
39  
40 - What would be the effects of biologics' substitution at a pharmacy level on treatment adherence,  
41 management of pharmacotherapy and monitoring of treatment?  
42  
43 - How to secure the batch number and traceability of the biological medicinal product?  
44  
45 - What should be considered from the drug storage point of view?

46 **Theme 4 Implementation and monitoring of potential biologics substitution**

- 47 - If substitution takes place in time, how would you like to see a change in practice?  
48  
49 - How should your organization / workplace / interest group and other stakeholders be involved in  
50 preparation for deployment?  
51  
52 - How the implementation of the substitution should be monitored?  
53  
54 - Is there something that has not been dealt with now, but which should be taken into account with  
55 substitution of biologics?  
56  
57  
58  
59  
60

Supplement Material 2

An illustration of the key actors in medicine distribution and patient care that were covered in the stakeholder interviews (n=32) concerning automated substitution of biologics in Finland.

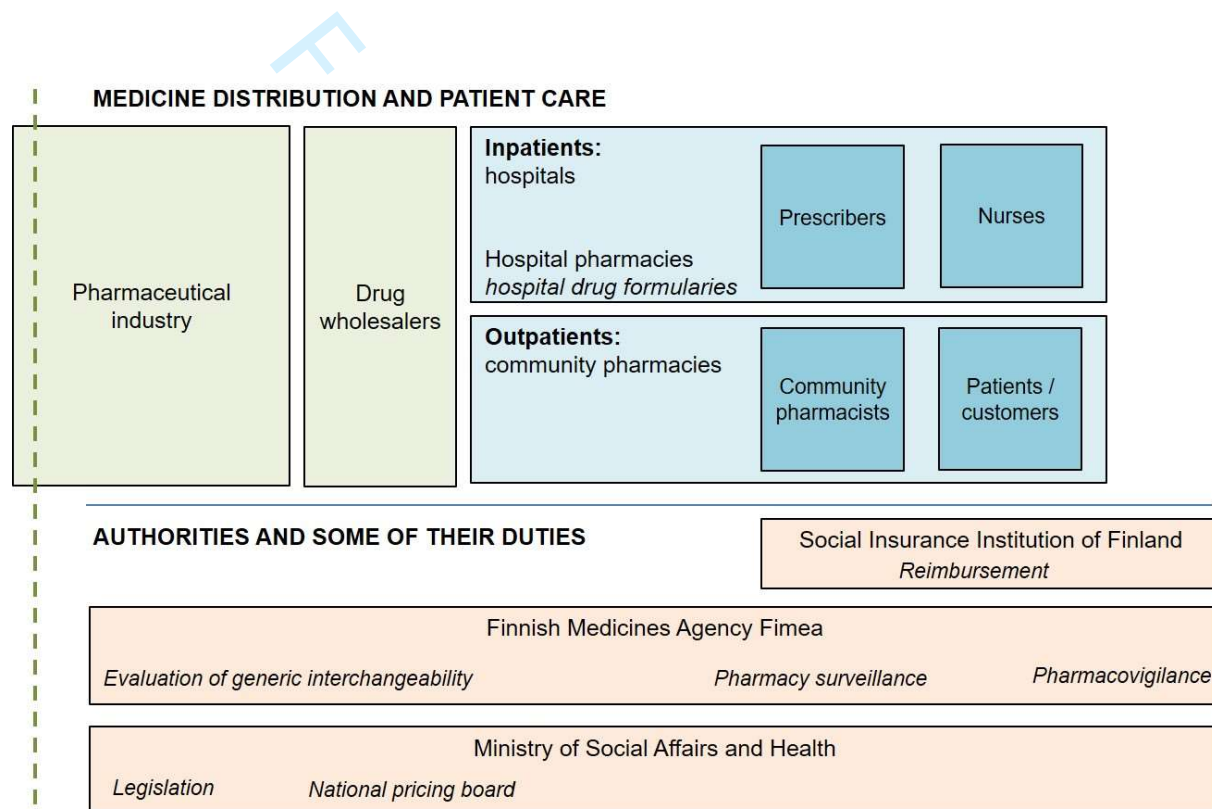

• Marketing authorization is a prerequisite for national procedure.

## STANDARDS FOR REPORTING QUALITATIVE RESEARCH (SRQR) CHECKLIST

| No                 | Topic and Item                                                                                                                                                                                                                                                                                                                                                                                      | Page / line no(s).                           |
|--------------------|-----------------------------------------------------------------------------------------------------------------------------------------------------------------------------------------------------------------------------------------------------------------------------------------------------------------------------------------------------------------------------------------------------|----------------------------------------------|
| Title and abstract |                                                                                                                                                                                                                                                                                                                                                                                                     |                                              |
| 1                  | <b>Title:</b> Concise description of the nature and topic of the study<br>Identifying the study as qualitative or indicating the approach (e.g., ethnography, grounded theory) or data collection methods (e.g., interview, focus group) is recommended                                                                                                                                             | 1 / 2-3                                      |
| 2                  | <b>Abstract:</b> Summary of key elements of the study using the abstract format of the intended publication; typically includes background, purpose, methods, results, and conclusions                                                                                                                                                                                                              | 2 / 1-28                                     |
| Introduction       |                                                                                                                                                                                                                                                                                                                                                                                                     |                                              |
| 3                  | <b>Problem formulation:</b> Description and significance of the problem/phenomenon studied; review of relevant theory and empirical work; problem statement                                                                                                                                                                                                                                         | 4 / 21-27                                    |
| 4                  | <b>Purpose or research question:</b> Purpose of the study and specific objectives or questions                                                                                                                                                                                                                                                                                                      | 4 / 27-30                                    |
| Methods            |                                                                                                                                                                                                                                                                                                                                                                                                     |                                              |
| 5                  | <b>Qualitative approach and research paradigm:</b> Qualitative approach (e.g., ethnography, grounded theory, case study, phenomenology, narrative research) and guiding theory if appropriate; identifying the research paradigm (e.g., postpositivist, constructivist/ interpretivist) is also recommended; rationale                                                                              | 6 / 21-22                                    |
| 6                  | <b>Researcher characteristics and reflexivity:</b> Researchers' characteristics that may influence the research, including personal attributes, qualifications/experience, relationship with participants, assumptions, and/or presuppositions; potential or actual interaction between researchers' characteristics and the research questions, approach, methods, results, and/or transferability | 6 / 8-9<br>6 / 13-15                         |
| 7                  | <b>Context:</b> Setting/site and salient contextual factors; rationale                                                                                                                                                                                                                                                                                                                              | 6 / 9-11                                     |
| 8                  | <b>Sampling strategy:</b> How and why research participants, documents, or events were selected; criteria for deciding when no further sampling was necessary (e.g., sampling saturation); rationale                                                                                                                                                                                                | 5 / 23-34<br>6 / 1-4                         |
| 9                  | <b>Ethical issues pertaining to human subjects:</b> Documentation of approval by an appropriate ethics review board and participant consent, or explanation for lack thereof; other confidentiality and data security issues                                                                                                                                                                        | 7 / 1-5                                      |
| 10                 | <b>Data collection methods:</b> Types of data collected; details of data collection procedures including (as appropriate) start and stop dates of data collection and analysis, iterative process, triangulation of sources/methods, and modification of procedures in response to evolving study findings; rationale                                                                               | 7 / 12-18                                    |
| 11                 | <b>Data collection instruments and technologies:</b> Description of instruments (e.g., interview guides, questionnaires) and devices (e.g., audio recorders) used for data collection; if/how the instrument(s) changed over the course of the study                                                                                                                                                | 5 / 7-21<br>6 / 7-8<br>Supplement material 1 |



| No               | Topic and Item                                                                                                                                                                                                                                                                                                                                                                                              | Page / line no(s).          |
|------------------|-------------------------------------------------------------------------------------------------------------------------------------------------------------------------------------------------------------------------------------------------------------------------------------------------------------------------------------------------------------------------------------------------------------|-----------------------------|
| 12               | <b>Units of study:</b> Number and relevant characteristics of participants, documents, or events included in the study; level of participation (could be reported in results)                                                                                                                                                                                                                               | Table 1 (page 7-8)          |
| 13               | <b>Data processing:</b> Methods for processing data prior to and during analysis, including transcription, data entry, data management and security, verification of data integrity, data coding, and anonymization/deidentification of excerpts                                                                                                                                                            | 6 / 17-21                   |
| 14               | <b>Data analysis:</b> Process by which inferences, themes, etc., were identified and developed, including the researchers involved in data analysis; usually references a specific paradigm or approach; rationale                                                                                                                                                                                          | 6 / 18-28                   |
| 15               | <b>Techniques to enhance trustworthiness:</b> Techniques to enhance trustworthiness and credibility of data analysis (e.g., member checking, audit trail, triangulation); rationale                                                                                                                                                                                                                         | 6 / 28-32                   |
| Results/findings |                                                                                                                                                                                                                                                                                                                                                                                                             |                             |
| 16               | <b>Synthesis and interpretation:</b> Main findings (e.g., interpretations, inferences, and themes); might include development of a theory or model, or integration with prior research or theory                                                                                                                                                                                                            | 8 / 3 -14 / 12<br>15 / 3-13 |
| 17               | <b>Links to empirical data:</b> Evidence (e.g., quotes, field notes, text excerpts, photographs) to substantiate analytic findings                                                                                                                                                                                                                                                                          | Table 2 (page 9)            |
| Discussion       |                                                                                                                                                                                                                                                                                                                                                                                                             |                             |
| 18               | <b>Integration with prior work, implications, transferability, and contribution(s) to the field:</b> Short summary of main findings; explanation of how findings and conclusions connect to, support, elaborate on, or challenge conclusions of earlier scholarship; discussion of scope of application/ generalizability; identification of unique contribution(s) to scholarship in a discipline or field | 15 / 1 – 18 / 28            |
| 19               | <b>Limitations:</b> Trustworthiness and limitations of findings                                                                                                                                                                                                                                                                                                                                             | 19 / 1-18                   |
| Other            |                                                                                                                                                                                                                                                                                                                                                                                                             |                             |
| 20               | <b>Conflicts of interest:</b> Potential sources of influence or perceived influence on study conduct and conclusions; how these were managed                                                                                                                                                                                                                                                                | 20 / 15-16                  |
| 21               | <b>Funding:</b> Sources of funding and other support; role of funders in data collection, interpretation, and reporting                                                                                                                                                                                                                                                                                     | 20 / 11-13                  |

#### Reference:

O'Brien BC, Harris IB, Beckman TJ, et al. Standards for reporting qualitative research: a synthesis of recommendations. *Academic Medicine* 2014;9:1245-51. doi: 10.1097/ACM.0000000000000388
