# Supplementary material for: Medication safety risks to be managed in national implementation of automatic substitution of biological medicines: a qualitative study
Source: PubMed Central journal article supplement — BMJ Open. 2019 Oct 28;9(10):e032892. doi: 10.1136/bmjopen-2019-032892 (PMC6830661; doi:10.1136/bmjopen-2019-032892), 2019-10-28

## Supplement Material 2

An illustration of the key actors in medicine distribution and patient care that were covered in the stakeholder interviews (n=32) concerning automated substitution of biologics in Finland.

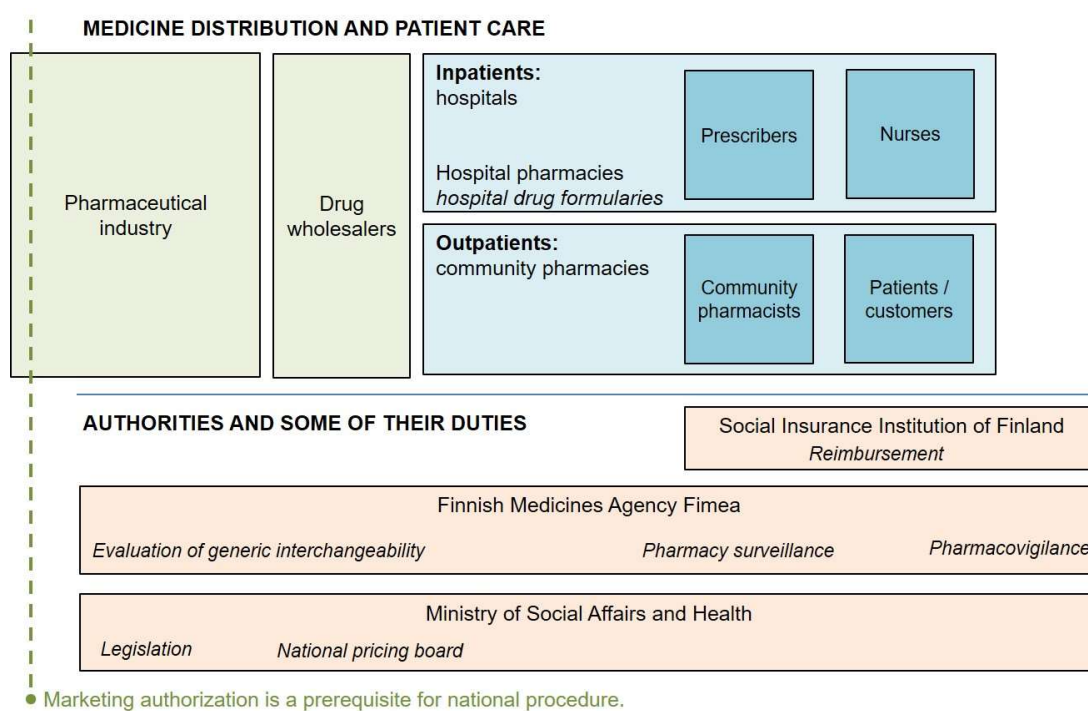

Supplement: bmjopen-2019-032892supp002.pdf [file bmjopen-2019-032892supp002.pdf]
